# Supplementary material for: A Novel Method for Predicting Disease-Associated LncRNA-MiRNA Pairs Based on the Higher-Order Orthogonal Iteration
Source: Comput Math Methods Med. 2019 May 2;2019:7614850. doi: 10.1155/2019/7614850 (PMC6525924; doi:10.1155/2019/7614850)
Supplement: Supplementary 4 — Table 3: 20324 known lncRNA-miRNA associations. [file 7614850.f4.xlsx]

## Sheet: Sheet1
miRNA	lncRNA
hsa-mir-200b-3p	CTA-204B4.6
hsa-mir-200b-3p	CTD-2630F21.1
hsa-mir-200b-3p	CTB-92J24.2
hsa-mir-200b-3p	RP11-473I1.10
hsa-mir-200b-3p	AC005154.5
hsa-mir-200b-3p	RP13-507I23.1
hsa-mir-200b-3p	RP11-18F14.2
hsa-mir-200b-3p	RP11-214C8.5
hsa-mir-200b-3p	OIP5-AS1
hsa-mir-200b-3p	CTD-3099C6.9
hsa-mir-200b-3p	RP11-277L2.2
hsa-mir-200b-3p	RP11-429J17.7
hsa-mir-200b-3p	C11orf95
hsa-mir-200b-3p	RP4-773N10.5
hsa-mir-200b-3p	RP11-690D19.3
hsa-mir-200b-3p	XIST
hsa-mir-200b-3p	RP5-1085F17.3
hsa-mir-200b-3p	LINC00641
hsa-mir-200b-3p	RP11-361F15.2
hsa-mir-200b-3p	CWC15
hsa-mir-200b-3p	SCAMP1
hsa-mir-200b-3p	RP11-145M9.4
hsa-mir-200b-3p	MAPKAPK5-AS1
hsa-mir-200b-3p	MALAT1
hsa-mir-200b-3p	RP11-379K17.4
hsa-mir-200b-3p	CTD-3185P2.1
hsa-mir-200b-3p	MATN1-AS1
hsa-mir-200b-3p	LINC00667
hsa-mir-200b-3p	PPP1R9B
hsa-mir-200b-3p	RP6-24A23.7
hsa-mir-200b-3p	RP11-403I13.4
hsa-mir-200b-3p	ZNF518A
hsa-mir-200b-3p	RP11-305E6.4
hsa-mir-200b-3p	RP11-91G21.2
hsa-mir-200b-3p	AC005154.6
hsa-mir-200b-3p	UBXN8
hsa-mir-200a-3p	PINK1-AS
hsa-mir-200a-3p	LA16c-306E5.2
hsa-mir-200a-3p	RP11-33N16.3
hsa-mir-200a-3p	RP11-203J24.9
hsa-mir-200a-3p	RP11-106M3.2
hsa-mir-200a-3p	AC010729.1
hsa-mir-200a-3p	DYX1C1-CCPG1
hsa-mir-200a-3p	OIP5-AS1
hsa-mir-200a-3p	RP11-793H13.8
hsa-mir-200a-3p	U47924.19
hsa-mir-200a-3p	SNHG16
hsa-mir-200a-3p	TMEM161B-AS1
hsa-mir-200a-3p	CTBP1-AS1
hsa-mir-200a-3p	RP11-13N13.2
hsa-mir-200a-3p	RP11-220I1.1
hsa-mir-200a-3p	RP1-283E3.8
hsa-mir-200a-3p	DLX6-AS1
hsa-mir-200a-3p	XIST
hsa-mir-200a-3p	RP11-539I5.1
hsa-mir-200a-3p	RP5-890O3.9
hsa-mir-200a-3p	AC003665.1
hsa-mir-200a-3p	LINC00661
hsa-mir-200a-3p	EMG1
hsa-mir-200a-3p	AC016629.8
hsa-mir-200a-3p	MALAT1
hsa-mir-200a-3p	SEC22B
hsa-mir-200a-3p	C17orf76-AS1
hsa-mir-200a-3p	TP73-AS1
hsa-mir-200a-3p	SNHG15
hsa-mir-200a-3p	LINC00319
hsa-mir-200a-3p	TRAF3IP2-AS1
hsa-mir-200a-3p	RP11-469M7.1
hsa-mir-200a-3p	AD000090.2
hsa-mir-429	CTA-204B4.6
hsa-mir-429	CTD-2630F21.1
hsa-mir-429	CTB-92J24.2
hsa-mir-429	RP11-473I1.10
hsa-mir-429	AC005154.5
hsa-mir-429	RP13-507I23.1
hsa-mir-429	RP11-18F14.2
hsa-mir-429	RP11-214C8.5
hsa-mir-429	OIP5-AS1
hsa-mir-429	CTD-3099C6.9
hsa-mir-429	RP11-277L2.2
hsa-mir-429	RP11-429J17.7
hsa-mir-429	C11orf95
hsa-mir-429	RP4-773N10.5
hsa-mir-429	RP11-690D19.3
hsa-mir-429	XIST
hsa-mir-429	LINC00641
hsa-mir-429	RP11-361F15.2
hsa-mir-429	SCAMP1
hsa-mir-429	CWC15
hsa-mir-429	RP11-145M9.4
hsa-mir-429	MAPKAPK5-AS1
hsa-mir-429	RP11-379K17.4
hsa-mir-429	MALAT1
hsa-mir-429	CTD-3185P2.1
hsa-mir-429	LINC00667
hsa-mir-429	MATN1-AS1
hsa-mir-429	PPP1R9B
hsa-mir-429	RP6-24A23.7
hsa-mir-429	RP11-403I13.4
hsa-mir-429	ZNF518A
hsa-mir-429	RP11-305E6.4
hsa-mir-429	RP11-91G21.2
hsa-mir-429	AC005154.6
hsa-mir-429	UBXN8
hsa-mir-551a	CTD-2090I13.1
hsa-mir-551a	RP11-227G15.3
hsa-mir-551a	AC009948.5
hsa-mir-551a	RP11-429J17.2
hsa-mir-34a-5p	CTA-204B4.6
hsa-mir-34a-5p	CTC-444N24.8
hsa-mir-34a-5p	CTD-2090I13.1
hsa-mir-34a-5p	RP11-420G6.4
hsa-mir-34a-5p	RP1-37E16.12
hsa-mir-34a-5p	AC005863.1
hsa-mir-34a-5p	CTC-503J8.6
hsa-mir-34a-5p	AC112229.7
hsa-mir-34a-5p	HCG18
hsa-mir-34a-5p	AC078852.1
hsa-mir-34a-5p	RP11-54O7.1
hsa-mir-34a-5p	CASP8AP2
hsa-mir-34a-5p	RP11-284N8.3
hsa-mir-34a-5p	CTD-2245O6.1
hsa-mir-34a-5p	RP11-397D12.6
hsa-mir-34a-5p	C11orf95
hsa-mir-34a-5p	RP4-773N10.5
hsa-mir-34a-5p	RP11-120D5.1
hsa-mir-34a-5p	RP11-20G6.3
hsa-mir-34a-5p	KCNQ1OT1
hsa-mir-34a-5p	LINC00662
hsa-mir-34a-5p	SNHG7
hsa-mir-34a-5p	XIST
hsa-mir-34a-5p	CTC-487M23.5
hsa-mir-34a-5p	RP11-552M11.4
hsa-mir-34a-5p	RP11-156L14.1
hsa-mir-34a-5p	GNAS-AS1
hsa-mir-34a-5p	NUTM2A-AS1
hsa-mir-34a-5p	CTC-281B15.1
hsa-mir-34a-5p	DCP1A
hsa-mir-34a-5p	CTD-2020K17.1
hsa-mir-34a-5p	CTD-3185P2.1
hsa-mir-34a-5p	LINC00667
hsa-mir-34a-5p	PCBP1-AS1
hsa-mir-34a-5p	RP11-730K11.1
hsa-mir-34a-5p	NEAT1
hsa-mir-34a-5p	RP11-216F19.2
hsa-mir-34a-5p	RP11-380L11.4
hsa-mir-34a-5p	RP11-6N17.9
hsa-mir-34a-5p	AC013268.5
hsa-mir-34a-5p	ERVK3-1
hsa-mir-34a-5p	RP11-65F13.2
hsa-mir-34a-5p	RP11-153A23.6
hsa-mir-34a-5p	RP1-5O6.6
hsa-mir-34a-5p	RP11-496I9.1
hsa-mir-378f	CTA-204B4.6
hsa-mir-378f	CTC-444N24.8
hsa-mir-378f	LINC00657
hsa-mir-378f	RP11-392M18.5
hsa-mir-378f	RP11-159D12.9
hsa-mir-378f	HCG18
hsa-mir-378f	OIP5-AS1
hsa-mir-378f	CASP8AP2
hsa-mir-378f	RN7SL1
hsa-mir-378f	FBXL19-AS1
hsa-mir-378f	JPX
hsa-mir-378f	AP006222.2
hsa-mir-378f	RP5-837J1.2
hsa-mir-378f	LINC00641
hsa-mir-378f	Z97634.5
hsa-mir-378f	SLC37A4
hsa-mir-378f	RECQL4
hsa-mir-378f	LINC00094
hsa-mir-378f	RP11-701H24.5
hsa-mir-378f	MALAT1
hsa-mir-378f	RP4-622L5.2
hsa-mir-378f	RP11-405O10.2
hsa-mir-378f	RP11-519M16.1
hsa-mir-30e-5p	CTA-204B4.6
hsa-mir-30e-5p	RP11-436A20.4
hsa-mir-30e-5p	RP11-175O19.4
hsa-mir-30e-5p	RP11-226L15.5
hsa-mir-30e-5p	LINC00657
hsa-mir-30e-5p	POLDIP2
hsa-mir-30e-5p	RP11-347I19.3
hsa-mir-30e-5p	RP11-38P22.2
hsa-mir-30e-5p	RP11-119F19.2
hsa-mir-30e-5p	AC016747.3
hsa-mir-30e-5p	HNRNPU-AS1
hsa-mir-30e-5p	RP11-106M3.2
hsa-mir-30e-5p	HCG18
hsa-mir-30e-5p	DLEU2
hsa-mir-30e-5p	DYX1C1-CCPG1
hsa-mir-30e-5p	RP11-311C24.1
hsa-mir-30e-5p	OIP5-AS1
hsa-mir-30e-5p	RP11-373L24.1
hsa-mir-30e-5p	CTBP1-AS1
hsa-mir-30e-5p	RP11-158I13.2
hsa-mir-30e-5p	RP11-371I1.2
hsa-mir-30e-5p	RP4-773N10.5
hsa-mir-30e-5p	RP5-935K16.1
hsa-mir-30e-5p	CTD-2116N17.1
hsa-mir-30e-5p	CTB-89H12.4
hsa-mir-30e-5p	XIST
hsa-mir-30e-5p	RP11-342K6.1
hsa-mir-30e-5p	AC096772.6
hsa-mir-30e-5p	MIR4720
hsa-mir-30e-5p	C14orf169
hsa-mir-30e-5p	RP11-361F15.2
hsa-mir-30e-5p	SCAMP1
hsa-mir-30e-5p	DCP1A
hsa-mir-30e-5p	EPB41L4A-AS1
hsa-mir-30e-5p	CTD-3064H18.6
hsa-mir-30e-5p	MALAT1
hsa-mir-30e-5p	RP11-73K9.2
hsa-mir-30e-5p	NEFL
hsa-mir-30e-5p	SLC26A4-AS1
hsa-mir-30e-5p	RP11-383C5.4
hsa-mir-30e-5p	AC084018.1
hsa-mir-30e-5p	RP6-24A23.7
hsa-mir-30e-5p	AC005152.2
hsa-mir-30e-5p	ZNF518A
hsa-mir-30e-5p	RP11-819C21.1
hsa-mir-30e-5p	RP11-618G20.1
hsa-mir-30e-5p	AD000090.2
hsa-mir-30e-5p	ERVK3-1
hsa-mir-30e-5p	AC141846.4
hsa-mir-30e-5p	RP5-955M13.3
hsa-mir-30e-5p	RP11-16E12.2
hsa-mir-30e-5p	TPT1-AS1
hsa-mir-30e-5p	RP13-890H12.2
hsa-mir-30e-5p	LINC00707
hsa-mir-30c-5p	CTA-204B4.6
hsa-mir-30c-5p	RP11-436A20.4
hsa-mir-30c-5p	RP11-175O19.4
hsa-mir-30c-5p	RP11-226L15.5
hsa-mir-30c-5p	LINC00657
hsa-mir-30c-5p	POLDIP2
hsa-mir-30c-5p	RP11-347I19.3
hsa-mir-30c-5p	RP11-38P22.2
hsa-mir-30c-5p	RP11-119F19.2
hsa-mir-30c-5p	AC016747.3
hsa-mir-30c-5p	HNRNPU-AS1
hsa-mir-30c-5p	RP11-106M3.2
hsa-mir-30c-5p	HCG18
hsa-mir-30c-5p	DLEU2
hsa-mir-30c-5p	DYX1C1-CCPG1
hsa-mir-30c-5p	RP11-311C24.1
hsa-mir-30c-5p	OIP5-AS1
hsa-mir-30c-5p	RP11-373L24.1
hsa-mir-30c-5p	CTBP1-AS1
hsa-mir-30c-5p	RP11-158I13.2
hsa-mir-30c-5p	RP11-371I1.2
hsa-mir-30c-5p	RP4-773N10.5
hsa-mir-30c-5p	RP5-935K16.1
hsa-mir-30c-5p	CTD-2116N17.1
hsa-mir-30c-5p	CTB-89H12.4
hsa-mir-30c-5p	XIST
hsa-mir-30c-5p	RP11-342K6.1
hsa-mir-30c-5p	AC096772.6
hsa-mir-30c-5p	MIR4720
hsa-mir-30c-5p	C14orf169
hsa-mir-30c-5p	RP11-361F15.2
hsa-mir-30c-5p	SCAMP1
hsa-mir-30c-5p	DCP1A
hsa-mir-30c-5p	EPB41L4A-AS1
hsa-mir-30c-5p	CTD-3064H18.6
hsa-mir-30c-5p	MALAT1
hsa-mir-30c-5p	RP11-73K9.2
hsa-mir-30c-5p	NEFL
hsa-mir-30c-5p	SLC26A4-AS1
hsa-mir-30c-5p	RP11-383C5.4
hsa-mir-30c-5p	AC084018.1
hsa-mir-30c-5p	RP6-24A23.7
hsa-mir-30c-5p	AC005152.2
hsa-mir-30c-5p	ZNF518A
hsa-mir-30c-5p	RP11-819C21.1
hsa-mir-30c-5p	RP11-618G20.1
hsa-mir-30c-5p	AD000090.2
hsa-mir-30c-5p	ERVK3-1
hsa-mir-30c-5p	AC141846.4
hsa-mir-30c-5p	RP5-955M13.3
hsa-mir-30c-5p	RP11-16E12.2
hsa-mir-30c-5p	TPT1-AS1
hsa-mir-30c-5p	RP13-890H12.2
hsa-mir-30c-5p	LINC00707
hsa-mir-761	CTC-338M12.3
hsa-mir-761	LINC00842
hsa-mir-761	AC135048.13
hsa-mir-761	AC016747.3
hsa-mir-761	RP11-278A23.2
hsa-mir-761	AC002331.1
hsa-mir-761	RP11-54O7.1
hsa-mir-761	LINC00339
hsa-mir-761	RP4-564F22.2
hsa-mir-761	AC096579.7
hsa-mir-761	RP11-277L2.2
hsa-mir-761	RP11-280F2.2
hsa-mir-761	RP11-244O19.1
hsa-mir-761	RP1-283E3.8
hsa-mir-761	HOXA11-AS
hsa-mir-761	XIST
hsa-mir-761	PLK1S1
hsa-mir-761	SENP3-EIF4A1
hsa-mir-761	NUTM2A-AS1
hsa-mir-761	SEMA3B
hsa-mir-761	SLC37A4
hsa-mir-761	RP11-276H19.1
hsa-mir-761	EPB41L4A-AS1
hsa-mir-761	LINC00652
hsa-mir-761	RP11-379K17.4
hsa-mir-761	RP11-795F19.1
hsa-mir-761	RP5-1086D14.6
hsa-mir-761	SDCBP2-AS1
hsa-mir-761	RP5-1198O20.4
hsa-mir-761	RP11-403I13.4
hsa-mir-761	ZNRD1-AS1
hsa-mir-761	HOTAIR
hsa-mir-761	RP11-380L11.4
hsa-mir-761	RP1-5O6.6
hsa-mir-761	RP11-325D5.3
hsa-mir-761	CTC-497E21.4
hsa-mir-761	RP11-1186N24.5
hsa-mir-761	SCGB1B2P
hsa-mir-761	RP11-464F9.1
hsa-mir-761	RP11-203J24.9
hsa-mir-761	LINC00086
hsa-mir-761	RP11-488C13.5
hsa-mir-761	HCG17
hsa-mir-761	RP13-507I23.1
hsa-mir-761	HCG18
hsa-mir-761	RP11-264B17.3
hsa-mir-761	RP11-506M13.3
hsa-mir-761	RP11-773D16.1
hsa-mir-761	RP4-773N10.5
hsa-mir-761	KCNQ1OT1
hsa-mir-761	AC092535.3
hsa-mir-761	AC113189.5
hsa-mir-761	LINC00242
hsa-mir-761	RP11-426A6.7
hsa-mir-761	RP11-467L20.9
hsa-mir-761	CWC15
hsa-mir-761	JRK
hsa-mir-761	RP11-186B7.4
hsa-mir-761	AC018766.4
hsa-mir-761	HCP5
hsa-mir-761	PPP1R9B
hsa-mir-761	NEAT1
hsa-mir-761	RP11-216F19.2
hsa-mir-761	FENDRR
hsa-mir-761	FGD5-AS1
hsa-mir-761	CTD-2353F22.1
hsa-mir-761	LINC00176
hsa-mir-761	RP11-16E12.2
hsa-mir-761	RP5-955M13.3
hsa-mir-101-3p	GABPB1-AS1
hsa-mir-101-3p	RP4-697K14.12
hsa-mir-101-3p	RP11-94L15.2
hsa-mir-101-3p	RP11-220I1.1
hsa-mir-101-3p	XIST
hsa-mir-101-3p	SNHG1
hsa-mir-101-3p	RP11-1134I14.8
hsa-mir-101-3p	RP11-923I11.1
hsa-mir-101-3p	RP11-618P17.3
hsa-mir-101-3p	RP11-140H17.1
hsa-mir-101-3p	FAM201A
hsa-mir-101-3p	RP4-659J6.2
hsa-mir-101-3p	RP11-498C9.15
hsa-mir-101-3p	CTB-25J19.9
hsa-mir-101-3p	RP1-239B22.5
hsa-mir-101-3p	LL22NC03-N27C7.1
hsa-mir-101-3p	RP11-361F15.2
hsa-mir-101-3p	MALAT1
hsa-mir-101-3p	NEAT1
hsa-mir-101-3p	RP11-216F19.2
hsa-mir-101-3p	ZNF518A
hsa-mir-101-3p	RP11-452F19.3
hsa-mir-101-3p	SNHG6
hsa-mir-101-3p	hsa-mir-142
hsa-mir-101-3p	RP11-199F11.2
hsa-mir-101-3p	hsa-mir-146a
hsa-mir-186-5p	RP11-206L10.11
hsa-mir-186-5p	RP11-226L15.5
hsa-mir-186-5p	HNRNPU-AS1
hsa-mir-186-5p	U82695.10
hsa-mir-186-5p	AC005154.5
hsa-mir-186-5p	RP11-701H24.2
hsa-mir-186-5p	RP11-102F4.3
hsa-mir-186-5p	OIP5-AS1
hsa-mir-186-5p	RP5-1180C10.2
hsa-mir-186-5p	CTD-2245O6.1
hsa-mir-186-5p	RP11-373L24.1
hsa-mir-186-5p	SNHG3
hsa-mir-186-5p	RP11-220I1.1
hsa-mir-186-5p	RP1-283E3.8
hsa-mir-186-5p	CTC-451A6.4
hsa-mir-186-5p	RP11-61A14.2
hsa-mir-186-5p	RP11-425I13.3
hsa-mir-186-5p	RP11-815I9.4
hsa-mir-186-5p	CTB-89H12.4
hsa-mir-186-5p	XIST
hsa-mir-186-5p	AC018737.1
hsa-mir-186-5p	RP1-228H13.5
hsa-mir-186-5p	SCAMP1
hsa-mir-186-5p	RP11-145M9.4
hsa-mir-186-5p	RP11-276H19.1
hsa-mir-186-5p	LINC00680
hsa-mir-186-5p	CTD-2037K23.2
hsa-mir-186-5p	RP6-24A23.7
hsa-mir-186-5p	RP11-379K17.11
hsa-mir-186-5p	LINC00665
hsa-mir-186-5p	RP11-350F4.2
hsa-mir-186-5p	COX10-AS1
hsa-mir-186-5p	PVT1
hsa-mir-186-5p	CTB-25J19.9
hsa-mir-186-5p	RP11-473I1.10
hsa-mir-186-5p	TUG1
hsa-mir-186-5p	CASP8AP2
hsa-mir-186-5p	BOLA3-AS1
hsa-mir-186-5p	SETD5-AS1
hsa-mir-186-5p	RP11-421L21.3
hsa-mir-186-5p	C11orf95
hsa-mir-186-5p	RP1-239B22.5
hsa-mir-186-5p	RP11-20G6.3
hsa-mir-186-5p	LINC00662
hsa-mir-186-5p	SNHG7
hsa-mir-186-5p	RP11-615I2.7
hsa-mir-186-5p	RP11-218M22.1
hsa-mir-186-5p	RP11-449D8.1
hsa-mir-186-5p	RP11-361F15.2
hsa-mir-186-5p	RP11-64K12.2
hsa-mir-186-5p	CTD-2540L5.5
hsa-mir-186-5p	DCP1A
hsa-mir-186-5p	AC005082.12
hsa-mir-186-5p	HCP5
hsa-mir-186-5p	FLG-AS1
hsa-mir-186-5p	CTC-444N24.11
hsa-mir-186-5p	MIR4500HG
hsa-mir-186-5p	ZNF518A
hsa-mir-186-5p	RP11-307E17.8
hsa-mir-186-5p	AC005154.6
hsa-mir-137	RP11-206L10.11
hsa-mir-137	RP11-37B2.1
hsa-mir-137	RP11-148B6.1
hsa-mir-137	OIP5-AS1
hsa-mir-137	AF127936.7
hsa-mir-137	CTB-89H12.4
hsa-mir-137	XIST
hsa-mir-137	SNHG1
hsa-mir-137	DAPK1-IT1
hsa-mir-137	RP11-123K3.4
hsa-mir-137	RP11-499P20.2
hsa-mir-137	AP000318.2
hsa-mir-137	SCAMP1
hsa-mir-137	RP1-178F10.3
hsa-mir-137	RP11-566E18.3
hsa-mir-137	RP11-498C9.15
hsa-mir-137	MAP3K14
hsa-mir-137	LA16c-306E5.2
hsa-mir-137	GAS5
hsa-mir-137	RP11-46C20.1
hsa-mir-137	LINC00849
hsa-mir-137	HOTAIRM1
hsa-mir-137	DCP1A
hsa-mir-137	RP1-184J9.2
hsa-mir-137	FGD5-AS1
hsa-mir-197-3p	CECR7
hsa-mir-197-3p	RP11-567J24.4
hsa-mir-197-3p	HNRNPU-AS1
hsa-mir-197-3p	AC091729.9
hsa-mir-197-3p	DYX1C1-CCPG1
hsa-mir-197-3p	JPX
hsa-mir-197-3p	CTBP1-AS1
hsa-mir-197-3p	SNHG12
hsa-mir-197-3p	RP11-815I9.4
hsa-mir-197-3p	SPPL2B
hsa-mir-197-3p	XIST
hsa-mir-197-3p	RP11-571M6.8
hsa-mir-197-3p	PTCHD3P1
hsa-mir-197-3p	SCAMP1
hsa-mir-197-3p	DHRS4-AS1
hsa-mir-197-3p	C17orf76-AS1
hsa-mir-197-3p	TP73-AS1
hsa-mir-197-3p	RP6-24A23.7
hsa-mir-197-3p	LIFR-AS1
hsa-mir-197-3p	MIR497HG
hsa-mir-197-3p	TUG1
hsa-mir-197-3p	RP11-10O17.2
hsa-mir-197-3p	RP4-614O4.11
hsa-mir-197-3p	KCNQ1OT1
hsa-mir-197-3p	LINC00641
hsa-mir-197-3p	MALAT1
hsa-mir-197-3p	CTC-444N24.11
hsa-mir-197-3p	RP11-267N12.3
hsa-mir-197-3p	VIM-AS1
hsa-mir-320b	ALMS1-IT1
hsa-mir-320b	RP11-1149O23.3
hsa-mir-320b	RP11-54O7.3
hsa-mir-320b	RP11-303E16.2
hsa-mir-320b	hsa-mir-6080
hsa-mir-320b	RP11-588K22.2
hsa-mir-320b	DYX1C1-CCPG1
hsa-mir-320b	OIP5-AS1
hsa-mir-320b	SNHG12
hsa-mir-320b	CBR3-AS1
hsa-mir-320b	SPPL2B
hsa-mir-320b	RP11-478C19.2
hsa-mir-320b	XIST
hsa-mir-320b	LINC00313
hsa-mir-320b	RP1-228H13.5
hsa-mir-320b	RP11-400F19.8
hsa-mir-320b	LINC00680
hsa-mir-320b	SEC22B
hsa-mir-320b	RP1-178F10.3
hsa-mir-320b	RP11-69E11.4
hsa-mir-320b	RP11-66D17.5
hsa-mir-320b	CTA-204B4.6
hsa-mir-320b	RP11-510M2.10
hsa-mir-320b	NR2F2-AS1
hsa-mir-320b	AC104389.28
hsa-mir-320b	HCG18
hsa-mir-320b	AC012065.7
hsa-mir-320b	CTD-3014M21.4
hsa-mir-320b	RP11-349A22.5
hsa-mir-320b	RP11-497H16.9
hsa-mir-320b	TMPO-AS1
hsa-mir-320b	AC092535.3
hsa-mir-320b	RP11-342K6.1
hsa-mir-320b	LINC00641
hsa-mir-320b	RP11-361F15.2
hsa-mir-320b	AC093323.3
hsa-mir-320b	RP11-173M1.8
hsa-mir-320b	DCP1A
hsa-mir-320b	MALAT1
hsa-mir-320b	PPP1R9B
hsa-mir-320b	TTC28-AS1
hsa-mir-320b	NEAT1
hsa-mir-320b	AC000068.5
hsa-mir-320b	TRAF3IP2-AS1
hsa-mir-320b	AC005154.6
hsa-mir-320b	FGD5-AS1
hsa-mir-320b	ILF3-AS1
hsa-mir-320b	WAC-AS1
hsa-mir-320b	LINC00341
hsa-mir-320b	hsa-mir-146a
hsa-mir-3118	RP4-697K14.12
hsa-mir-3118	ERI3-IT1
hsa-mir-3118	ZBED3-AS1
hsa-mir-3118	BZRAP1-AS1
hsa-mir-3118	RP11-98D18.9
hsa-mir-3118	RP11-277L2.2
hsa-mir-3118	AC005062.2
hsa-mir-3118	RP5-837J1.2
hsa-mir-3118	RP11-478C19.2
hsa-mir-3118	RP11-290F20.3
hsa-mir-3118	AC005562.1
hsa-mir-3118	SCAMP1
hsa-mir-3118	RP11-400F19.6
hsa-mir-3118	SEC22B
hsa-mir-3118	RP11-403I13.4
hsa-mir-3118	RP5-1172N10.4
hsa-mir-3118	RP3-368A4.5
hsa-mir-3118	LINC00665
hsa-mir-3118	hsa-mir-212
hsa-mir-3118	RP11-566E18.3
hsa-mir-3118	WDR7-UA1
hsa-mir-3118	RP11-498C9.15
hsa-mir-3118	PINK1-AS
hsa-mir-3118	RP1-37E16.12
hsa-mir-3118	RP11-214C8.5
hsa-mir-3118	C11orf95
hsa-mir-3118	KCNQ1OT1
hsa-mir-3118	RP11-552M11.4
hsa-mir-3118	RP11-216F19.2
hsa-mir-3118	RAMP2-AS1
hsa-mir-3118	hsa-mir-142
hsa-mir-3118	RP5-955M13.3
hsa-mir-3118	RP11-16E12.2
hsa-mir-190b	RP11-102F4.3
hsa-mir-190b	SNHG16
hsa-mir-190b	GS1-358P8.4
hsa-mir-190b	RP11-890B15.3
hsa-mir-190b	XIST
hsa-mir-190b	MIR4720
hsa-mir-190b	AC084219.4
hsa-mir-190b	RP11-734I18.1
hsa-mir-190b	CTD-2619J13.14
hsa-mir-190b	PVT1
hsa-mir-190b	RP11-38P22.2
hsa-mir-190b	LINC00662
hsa-mir-190b	RP11-227D2.3
hsa-mir-190b	RP11-57H14.4
hsa-mir-190b	PRIM2
hsa-mir-190b	AC007255.7
hsa-mir-190b	RP11-255C15.3
hsa-mir-190b	UBXN8
hsa-mir-190b	RP11-65F13.2
hsa-mir-92b-3p	AC034220.3
hsa-mir-92b-3p	AC005307.3
hsa-mir-92b-3p	RP11-206L10.11
hsa-mir-92b-3p	AC074117.10
hsa-mir-92b-3p	LINC00657
hsa-mir-92b-3p	TBX5-AS1
hsa-mir-92b-3p	OIP5-AS1
hsa-mir-92b-3p	SNHG5
hsa-mir-92b-3p	PITPNA-AS1
hsa-mir-92b-3p	RP11-815I9.4
hsa-mir-92b-3p	XIST
hsa-mir-92b-3p	DAPK1-IT1
hsa-mir-92b-3p	RP4-714D9.5
hsa-mir-92b-3p	SCAMP1
hsa-mir-92b-3p	RP3-368A4.6
hsa-mir-92b-3p	AC093627.10
hsa-mir-92b-3p	AC007228.9
hsa-mir-92b-3p	SNHG14
hsa-mir-92b-3p	RP11-492E3.1
hsa-mir-92b-3p	RP11-234O6.2
hsa-mir-92b-3p	RP1-5O6.6
hsa-mir-92b-3p	AC005943.5
hsa-mir-92b-3p	RP11-98I9.4
hsa-mir-92b-3p	RP11-473I1.10
hsa-mir-92b-3p	RP3-508I15.9
hsa-mir-92b-3p	RNU4ATAC
hsa-mir-92b-3p	RP3-523K23.2
hsa-mir-92b-3p	RP3-341D10.4
hsa-mir-92b-3p	RP11-46C20.1
hsa-mir-92b-3p	RP11-449D8.1
hsa-mir-92b-3p	MALAT1
hsa-mir-92b-3p	NEFL
hsa-mir-92b-3p	RP11-65F13.2
hsa-mir-9-5p	HNRNPU-AS1
hsa-mir-9-5p	RP11-793H13.8
hsa-mir-9-5p	RP11-299M14.2
hsa-mir-9-5p	AC093642.3
hsa-mir-9-5p	RP11-170L3.8
hsa-mir-9-5p	XIST
hsa-mir-9-5p	SENP3-EIF4A1
hsa-mir-9-5p	PTCHD3P1
hsa-mir-9-5p	AC005076.5
hsa-mir-9-5p	AC007246.3
hsa-mir-9-5p	UHRF1
hsa-mir-9-5p	PCBP1-AS1
hsa-mir-9-5p	RP6-24A23.7
hsa-mir-9-5p	ZNRD1-AS1
hsa-mir-9-5p	LINC00665
hsa-mir-9-5p	RP11-519M16.1
hsa-mir-9-5p	RP11-511P7.2
hsa-mir-9-5p	MAP3K14
hsa-mir-9-5p	RP1-37E16.12
hsa-mir-9-5p	CTB-25J19.9
hsa-mir-9-5p	RP11-473I1.10
hsa-mir-9-5p	RP13-507I23.1
hsa-mir-9-5p	HCG18
hsa-mir-9-5p	TUG1
hsa-mir-9-5p	RP11-96D1.10
hsa-mir-9-5p	AL163636.6
hsa-mir-9-5p	SNHG7
hsa-mir-9-5p	RP11-64K12.2
hsa-mir-9-5p	MAGI1-IT1
hsa-mir-9-5p	RP11-622K12.1
hsa-mir-9-5p	ZNF252P-AS1
hsa-mir-9-5p	NEFL
hsa-mir-9-5p	NEAT1
hsa-mir-9-5p	RP11-658F2.8
hsa-mir-9-5p	AC017048.3
hsa-mir-214-3p	CTC-338M12.3
hsa-mir-214-3p	LINC00842
hsa-mir-214-3p	AC135048.13
hsa-mir-214-3p	AC016747.3
hsa-mir-214-3p	RP11-278A23.2
hsa-mir-214-3p	AC002331.1
hsa-mir-214-3p	RP11-54O7.1
hsa-mir-214-3p	LINC00339
hsa-mir-214-3p	RP4-564F22.2
hsa-mir-214-3p	AC096579.7
hsa-mir-214-3p	RP11-277L2.2
hsa-mir-214-3p	RP11-280F2.2
hsa-mir-214-3p	RP11-244O19.1
hsa-mir-214-3p	RP1-283E3.8
hsa-mir-214-3p	HOXA11-AS
hsa-mir-214-3p	XIST
hsa-mir-214-3p	PLK1S1
hsa-mir-214-3p	SENP3-EIF4A1
hsa-mir-214-3p	NUTM2A-AS1
hsa-mir-214-3p	SEMA3B
hsa-mir-214-3p	SLC37A4
hsa-mir-214-3p	RP11-276H19.1
hsa-mir-214-3p	EPB41L4A-AS1
hsa-mir-214-3p	LINC00652
hsa-mir-214-3p	RP11-379K17.4
hsa-mir-214-3p	RP11-795F19.1
hsa-mir-214-3p	RP5-1086D14.6
hsa-mir-214-3p	SDCBP2-AS1
hsa-mir-214-3p	RP5-1198O20.4
hsa-mir-214-3p	RP11-403I13.4
hsa-mir-214-3p	ZNRD1-AS1
hsa-mir-214-3p	HOTAIR
hsa-mir-214-3p	RP11-380L11.4
hsa-mir-214-3p	RP1-5O6.6
hsa-mir-214-3p	RP11-325D5.3
hsa-mir-214-3p	SCGB1B2P
hsa-mir-214-3p	RP11-1186N24.5
hsa-mir-214-3p	CTC-497E21.4
hsa-mir-214-3p	RP11-203J24.9
hsa-mir-214-3p	RP11-464F9.1
hsa-mir-214-3p	LINC00086
hsa-mir-214-3p	HCG17
hsa-mir-214-3p	RP11-488C13.5
hsa-mir-214-3p	RP13-507I23.1
hsa-mir-214-3p	HCG18
hsa-mir-214-3p	RP11-264B17.3
hsa-mir-214-3p	RP11-506M13.3
hsa-mir-214-3p	RP11-773D16.1
hsa-mir-214-3p	RP4-773N10.5
hsa-mir-214-3p	KCNQ1OT1
hsa-mir-214-3p	AC092535.3
hsa-mir-214-3p	LINC00242
hsa-mir-214-3p	AC113189.5
hsa-mir-214-3p	RP11-426A6.7
hsa-mir-214-3p	RP11-467L20.9
hsa-mir-214-3p	CWC15
hsa-mir-214-3p	JRK
hsa-mir-214-3p	HCP5
hsa-mir-214-3p	RP11-186B7.4
hsa-mir-214-3p	PPP1R9B
hsa-mir-214-3p	NEAT1
hsa-mir-214-3p	RP11-216F19.2
hsa-mir-214-3p	FENDRR
hsa-mir-214-3p	CTD-2353F22.1
hsa-mir-214-3p	FGD5-AS1
hsa-mir-214-3p	LINC00176
hsa-mir-214-3p	RP5-955M13.3
hsa-mir-214-3p	RP11-16E12.2
hsa-mir-199a-5p	AC005307.3
hsa-mir-199a-5p	HNRNPU-AS1
hsa-mir-199a-5p	MIR600HG
hsa-mir-199a-5p	XXbac-B461K10.4
hsa-mir-199a-5p	RP11-106M3.2
hsa-mir-199a-5p	CTB-102L5.7
hsa-mir-199a-5p	AL589743.1
hsa-mir-199a-5p	SNHG12
hsa-mir-199a-5p	RP11-170L3.8
hsa-mir-199a-5p	RP11-425I13.3
hsa-mir-199a-5p	LINC00313
hsa-mir-199a-5p	RP11-372K14.2
hsa-mir-199a-5p	RP11-400F19.6
hsa-mir-199a-5p	C17orf76-AS1
hsa-mir-199a-5p	RP6-24A23.7
hsa-mir-199a-5p	RP11-173C20.2
hsa-mir-199a-5p	RP11-140H17.1
hsa-mir-199a-5p	CTD-3195I5.1
hsa-mir-199a-5p	RP1-178F10.3
hsa-mir-199a-5p	AC108142.1
hsa-mir-199a-5p	ZNF833P
hsa-mir-199a-5p	RP1-5O6.6
hsa-mir-199a-5p	RP11-510M2.10
hsa-mir-199a-5p	RP11-473I1.10
hsa-mir-199a-5p	RP11-203J24.9
hsa-mir-199a-5p	RP11-213H15.3
hsa-mir-199a-5p	RP11-108M9.3
hsa-mir-199a-5p	RP11-96D1.10
hsa-mir-199a-5p	CTC-459F4.3
hsa-mir-199a-5p	DLX6-AS1
hsa-mir-199a-5p	LINC00662
hsa-mir-199a-5p	RP11-615I2.7
hsa-mir-199a-5p	CTD-2020K17.1
hsa-mir-199a-5p	AC092835.2
hsa-mir-199a-5p	RP11-316M1.11
hsa-mir-199a-5p	RP11-252A24.7
hsa-mir-199a-5p	AC021016.6
hsa-mir-199a-5p	RP5-875O13.1
hsa-mir-488-3p	RP11-175O19.4
hsa-mir-488-3p	CTB-25B13.12
hsa-mir-488-3p	SNHG16
hsa-mir-488-3p	RP11-697M17.1
hsa-mir-488-3p	AC093642.3
hsa-mir-488-3p	XIST
hsa-mir-488-3p	SENP3-EIF4A1
hsa-mir-488-3p	NUTM2A-AS1
hsa-mir-488-3p	TP73-AS1
hsa-mir-488-3p	CTD-3185P2.2
hsa-mir-488-3p	FAM201A
hsa-mir-488-3p	CTD-2270L9.5
hsa-mir-488-3p	RP11-510M2.10
hsa-mir-488-3p	PVT1
hsa-mir-488-3p	RP11-473I1.10
hsa-mir-488-3p	RP5-1085F17.3
hsa-mir-488-3p	RP5-1186N24.3
hsa-mir-488-3p	CTD-2369P2.2
hsa-mir-488-3p	LINC00176
hsa-mir-4735-3p	RP11-175O19.4
hsa-mir-4735-3p	POLDIP2
hsa-mir-4735-3p	RP5-894A10.6
hsa-mir-4735-3p	RP11-311C24.1
hsa-mir-4735-3p	OIP5-AS1
hsa-mir-4735-3p	AC156455.1
hsa-mir-4735-3p	GS1-358P8.4
hsa-mir-4735-3p	RP11-170L3.8
hsa-mir-4735-3p	RP11-690D19.3
hsa-mir-4735-3p	XIST
hsa-mir-4735-3p	SNHG1
hsa-mir-4735-3p	H19
hsa-mir-4735-3p	Z97634.5
hsa-mir-4735-3p	RP11-372K14.2
hsa-mir-4735-3p	RECQL4
hsa-mir-4735-3p	LINC00617
hsa-mir-4735-3p	RP11-977G19.5
hsa-mir-4735-3p	RP11-553L6.5
hsa-mir-4735-3p	SDCBP2-AS1
hsa-mir-4735-3p	RP6-24A23.7
hsa-mir-4735-3p	SNHG15
hsa-mir-4735-3p	RP11-379K17.11
hsa-mir-4735-3p	hsa-mir-212
hsa-mir-4735-3p	LINC00467
hsa-mir-4735-3p	RP11-228B15.4
hsa-mir-4735-3p	RP11-498C9.15
hsa-mir-4735-3p	RP1-37E16.12
hsa-mir-4735-3p	BCDIN3D-AS1
hsa-mir-4735-3p	KB-318B8.7
hsa-mir-4735-3p	LOXL1-AS1
hsa-mir-4735-3p	GAS5
hsa-mir-4735-3p	RP11-834C11.4
hsa-mir-4735-3p	SPTY2D1-AS1
hsa-mir-4735-3p	KCNQ1OT1
hsa-mir-4735-3p	AF011889.5
hsa-mir-4735-3p	LINC00622
hsa-mir-4735-3p	CASC2
hsa-mir-4735-3p	FENDRR
hsa-mir-181b-5p	ALMS1-IT1
hsa-mir-181b-5p	CCAT1
hsa-mir-181b-5p	HNRNPU-AS1
hsa-mir-181b-5p	RP11-311C24.1
hsa-mir-181b-5p	RP11-415J8.7
hsa-mir-181b-5p	RP5-1180C10.2
hsa-mir-181b-5p	CTD-2538C1.2
hsa-mir-181b-5p	RP11-373L24.1
hsa-mir-181b-5p	SNHG12
hsa-mir-181b-5p	RP11-170L3.8
hsa-mir-181b-5p	CTD-2116N17.1
hsa-mir-181b-5p	CTB-89H12.4
hsa-mir-181b-5p	RP11-478C19.2
hsa-mir-181b-5p	XIST
hsa-mir-181b-5p	SENP3-EIF4A1
hsa-mir-181b-5p	PTCHD3P1
hsa-mir-181b-5p	AC084219.4
hsa-mir-181b-5p	RP4-785G19.5
hsa-mir-181b-5p	PSMD6-AS2
hsa-mir-181b-5p	RP11-145M9.4
hsa-mir-181b-5p	AC079117.1
hsa-mir-181b-5p	AC006262.5
hsa-mir-181b-5p	AC079767.2
hsa-mir-181b-5p	SNHG14
hsa-mir-181b-5p	ZNF883
hsa-mir-181b-5p	RP1-178F10.3
hsa-mir-181b-5p	CDKN2B-AS1
hsa-mir-181b-5p	CTA-204B4.6
hsa-mir-181b-5p	AC005943.5
hsa-mir-181b-5p	RP11-701H24.4
hsa-mir-181b-5p	RP11-315C6.3
hsa-mir-181b-5p	RP11-213H15.3
hsa-mir-181b-5p	CROCCP2
hsa-mir-181b-5p	RP1-265C24.9
hsa-mir-181b-5p	SETD5-AS1
hsa-mir-181b-5p	RP11-480D4.3
hsa-mir-181b-5p	SNHG7
hsa-mir-181b-5p	RP11-615I2.7
hsa-mir-181b-5p	RP11-361F15.2
hsa-mir-181b-5p	AC121336.2
hsa-mir-181b-5p	AC009299.3
hsa-mir-181b-5p	RP11-715F3.2
hsa-mir-181b-5p	MALAT1
hsa-mir-181b-5p	AC092835.2
hsa-mir-181b-5p	LINC00667
hsa-mir-181b-5p	NEAT1
hsa-mir-181b-5p	RP11-216F19.2
hsa-mir-181b-5p	RP11-618G20.1
hsa-mir-181b-5p	AC005154.6
hsa-mir-181b-5p	INTS6-AS1
hsa-mir-181a-5p	ALMS1-IT1
hsa-mir-181a-5p	CCAT1
hsa-mir-181a-5p	HNRNPU-AS1
hsa-mir-181a-5p	RP11-311C24.1
hsa-mir-181a-5p	RP11-415J8.7
hsa-mir-181a-5p	RP5-1180C10.2
hsa-mir-181a-5p	CTD-2538C1.2
hsa-mir-181a-5p	RP11-373L24.1
hsa-mir-181a-5p	SNHG12
hsa-mir-181a-5p	RP11-170L3.8
hsa-mir-181a-5p	CTD-2116N17.1
hsa-mir-181a-5p	CTB-89H12.4
hsa-mir-181a-5p	RP11-478C19.2
hsa-mir-181a-5p	XIST
hsa-mir-181a-5p	SENP3-EIF4A1
hsa-mir-181a-5p	PTCHD3P1
hsa-mir-181a-5p	AC084219.4
hsa-mir-181a-5p	RP4-785G19.5
hsa-mir-181a-5p	PSMD6-AS2
hsa-mir-181a-5p	RP11-145M9.4
hsa-mir-181a-5p	AC079117.1
hsa-mir-181a-5p	AC006262.5
hsa-mir-181a-5p	AC079767.2
hsa-mir-181a-5p	SNHG14
hsa-mir-181a-5p	ZNF883
hsa-mir-181a-5p	RP1-178F10.3
hsa-mir-181a-5p	CDKN2B-AS1
hsa-mir-181a-5p	CTA-204B4.6
hsa-mir-181a-5p	AC005943.5
hsa-mir-181a-5p	RP11-701H24.4
hsa-mir-181a-5p	RP11-315C6.3
hsa-mir-181a-5p	RP11-213H15.3
hsa-mir-181a-5p	CROCCP2
hsa-mir-181a-5p	RP1-265C24.9
hsa-mir-181a-5p	SETD5-AS1
hsa-mir-181a-5p	RP11-480D4.3
hsa-mir-181a-5p	SNHG7
hsa-mir-181a-5p	RP11-615I2.7
hsa-mir-181a-5p	RP11-361F15.2
hsa-mir-181a-5p	AC121336.2
hsa-mir-181a-5p	AC009299.3
hsa-mir-181a-5p	RP11-715F3.2
hsa-mir-181a-5p	MALAT1
hsa-mir-181a-5p	AC092835.2
hsa-mir-181a-5p	LINC00667
hsa-mir-181a-5p	NEAT1
hsa-mir-181a-5p	RP11-216F19.2
hsa-mir-181a-5p	RP11-618G20.1
hsa-mir-181a-5p	AC005154.6
hsa-mir-181a-5p	INTS6-AS1
hsa-mir-135b-5p	RP11-303E16.2
hsa-mir-135b-5p	RP11-109M17.2
hsa-mir-135b-5p	HNRNPU-AS1
hsa-mir-135b-5p	RP11-231E4.4
hsa-mir-135b-5p	APCDD1L-AS1
hsa-mir-135b-5p	DANCR
hsa-mir-135b-5p	SNHG3
hsa-mir-135b-5p	CTB-89H12.4
hsa-mir-135b-5p	XIST
hsa-mir-135b-5p	CTC-308K20.1
hsa-mir-135b-5p	RP4-671G15.3
hsa-mir-135b-5p	ZNF718
hsa-mir-135b-5p	CTA-204B4.6
hsa-mir-135b-5p	CTC-444N24.8
hsa-mir-135b-5p	LA16c-306E5.2
hsa-mir-135b-5p	RP11-98I9.4
hsa-mir-135b-5p	RP11-315C6.3
hsa-mir-135b-5p	RP11-973H7.2
hsa-mir-135b-5p	RP11-1186N24.5
hsa-mir-135b-5p	GAS5
hsa-mir-135b-5p	CASP8AP2
hsa-mir-135b-5p	TMEM161B-AS1
hsa-mir-135b-5p	RP11-46C20.1
hsa-mir-135b-5p	RP4-773N10.5
hsa-mir-135b-5p	RP11-342K6.1
hsa-mir-135b-5p	RP11-449D8.1
hsa-mir-135b-5p	DCP1A
hsa-mir-135b-5p	MALAT1
hsa-mir-135b-5p	ZNF518A
hsa-mir-135b-5p	TEN1-CDK3
hsa-mir-135b-5p	RP11-18I14.10
hsa-mir-135b-5p	RP5-955M13.3
hsa-mir-135b-5p	BX322557.10
hsa-mir-29c-3p	RP4-665N4.8
hsa-mir-29c-3p	HOXA-AS3
hsa-mir-29c-3p	AC005154.5
hsa-mir-29c-3p	RP11-311C24.1
hsa-mir-29c-3p	OIP5-AS1
hsa-mir-29c-3p	GS1-124K5.11
hsa-mir-29c-3p	U47924.19
hsa-mir-29c-3p	RP11-373L24.1
hsa-mir-29c-3p	RP11-280F2.2
hsa-mir-29c-3p	AP000304.2
hsa-mir-29c-3p	RP11-220I1.1
hsa-mir-29c-3p	CTD-2116N17.1
hsa-mir-29c-3p	RP5-837J1.2
hsa-mir-29c-3p	CTD-2517M14.5
hsa-mir-29c-3p	ZNF761
hsa-mir-29c-3p	SPPL2B
hsa-mir-29c-3p	XIST
hsa-mir-29c-3p	H19
hsa-mir-29c-3p	RP11-429J17.2
hsa-mir-29c-3p	RP11-145M9.4
hsa-mir-29c-3p	RP11-303E16.8
hsa-mir-29c-3p	EMG1
hsa-mir-29c-3p	MLLT4-AS1
hsa-mir-29c-3p	HOXA-AS4
hsa-mir-29c-3p	LIFR-AS1
hsa-mir-29c-3p	AC007036.5
hsa-mir-29c-3p	RP11-690G19.3
hsa-mir-29c-3p	RP11-347I19.3
hsa-mir-29c-3p	GAS5
hsa-mir-29c-3p	TUG1
hsa-mir-29c-3p	RP11-227G15.3
hsa-mir-29c-3p	SETD5-AS1
hsa-mir-29c-3p	CTD-2339L15.1
hsa-mir-29c-3p	LINC00511
hsa-mir-29c-3p	RP11-480D4.3
hsa-mir-29c-3p	MIAT
hsa-mir-29c-3p	RP11-290F20.1
hsa-mir-29c-3p	KCNQ1OT1
hsa-mir-29c-3p	RP11-615I2.7
hsa-mir-29c-3p	RP11-467L20.9
hsa-mir-29c-3p	HCP5
hsa-mir-29c-3p	LINC00338
hsa-mir-29c-3p	RP11-216F19.2
hsa-mir-29c-3p	SIK3-IT1
hsa-mir-29c-3p	ZNF518A
hsa-mir-29c-3p	AC012146.7
hsa-mir-29c-3p	RP11-618G20.1
hsa-mir-29c-3p	AC005154.6
hsa-mir-29b-3p	RP4-665N4.8
hsa-mir-29b-3p	HOXA-AS3
hsa-mir-29b-3p	AC005154.5
hsa-mir-29b-3p	RP11-311C24.1
hsa-mir-29b-3p	OIP5-AS1
hsa-mir-29b-3p	GS1-124K5.11
hsa-mir-29b-3p	U47924.19
hsa-mir-29b-3p	RP11-373L24.1
hsa-mir-29b-3p	AP000304.2
hsa-mir-29b-3p	RP11-220I1.1
hsa-mir-29b-3p	CTD-2116N17.1
hsa-mir-29b-3p	RP5-837J1.2
hsa-mir-29b-3p	CTD-2517M14.5
hsa-mir-29b-3p	ZNF761
hsa-mir-29b-3p	SPPL2B
hsa-mir-29b-3p	XIST
hsa-mir-29b-3p	H19
hsa-mir-29b-3p	RP11-429J17.2
hsa-mir-29b-3p	RP11-145M9.4
hsa-mir-29b-3p	RP11-303E16.8
hsa-mir-29b-3p	EMG1
hsa-mir-29b-3p	MLLT4-AS1
hsa-mir-29b-3p	HOXA-AS4
hsa-mir-29b-3p	LIFR-AS1
hsa-mir-29b-3p	AC007036.5
hsa-mir-29b-3p	RP11-690G19.3
hsa-mir-29b-3p	RP11-347I19.3
hsa-mir-29b-3p	GAS5
hsa-mir-29b-3p	TUG1
hsa-mir-29b-3p	RP11-227G15.3
hsa-mir-29b-3p	SETD5-AS1
hsa-mir-29b-3p	CTD-2339L15.1
hsa-mir-29b-3p	LINC00511
hsa-mir-29b-3p	RP11-480D4.3
hsa-mir-29b-3p	MIAT
hsa-mir-29b-3p	RP11-290F20.1
hsa-mir-29b-3p	KCNQ1OT1
hsa-mir-29b-3p	RP11-615I2.7
hsa-mir-29b-3p	RP11-467L20.9
hsa-mir-29b-3p	HCP5
hsa-mir-29b-3p	LINC00338
hsa-mir-29b-3p	RP11-216F19.2
hsa-mir-29b-3p	SIK3-IT1
hsa-mir-29b-3p	ZNF518A
hsa-mir-29b-3p	AC012146.7
hsa-mir-29b-3p	RP11-618G20.1
hsa-mir-29b-3p	AC005154.6
hsa-mir-205-5p	LINC00657
hsa-mir-205-5p	RP11-395G23.3
hsa-mir-205-5p	HNRNPU-AS1
hsa-mir-205-5p	MCM3AP-AS1
hsa-mir-205-5p	SNHG5
hsa-mir-205-5p	SNHG16
hsa-mir-205-5p	LA16c-313D11.11
hsa-mir-205-5p	RP11-21N3.1
hsa-mir-205-5p	RP11-67A1.2
hsa-mir-205-5p	CTB-89H12.4
hsa-mir-205-5p	RP11-429J17.2
hsa-mir-205-5p	AP001469.9
hsa-mir-205-5p	RPS10P7
hsa-mir-205-5p	THAP9-AS1
hsa-mir-205-5p	RP11-379K17.11
hsa-mir-205-5p	AC108142.1
hsa-mir-205-5p	RP11-395B7.7
hsa-mir-205-5p	RP11-38P22.2
hsa-mir-205-5p	GAS5
hsa-mir-205-5p	RP13-507I23.1
hsa-mir-205-5p	KIAA1984-AS1
hsa-mir-205-5p	RP11-349A22.5
hsa-mir-205-5p	RP11-435O5.2
hsa-mir-205-5p	MALAT1
hsa-mir-205-5p	ZNF518A
hsa-mir-205-5p	CTC-273B12.8
hsa-mir-205-5p	UBXN8
hsa-mir-205-5p	ERVK3-1
hsa-mir-205-5p	LINC00707
hsa-mir-215-5p	RP11-170L3.8
hsa-mir-215-5p	XIST
hsa-mir-215-5p	RP11-400F19.6
hsa-mir-215-5p	AC084018.1
hsa-mir-215-5p	RP11-276H19.2
hsa-mir-215-5p	RP11-347I19.3
hsa-mir-215-5p	RP5-1028K7.2
hsa-mir-215-5p	RP11-216F19.2
hsa-mir-194-5p	RP11-94L15.2
hsa-mir-194-5p	HNRNPU-AS1
hsa-mir-194-5p	RP11-877E17.2
hsa-mir-194-5p	MCM3AP-AS1
hsa-mir-194-5p	MIR155HG
hsa-mir-194-5p	GS1-358P8.4
hsa-mir-194-5p	RP11-540O11.1
hsa-mir-194-5p	XIST
hsa-mir-194-5p	H19
hsa-mir-194-5p	RP11-549J18.1
hsa-mir-194-5p	SCAMP1
hsa-mir-194-5p	MAPKAPK5-AS1
hsa-mir-194-5p	RP11-214K3.21
hsa-mir-194-5p	TP73-AS1
hsa-mir-194-5p	ZNF883
hsa-mir-194-5p	CTA-204B4.6
hsa-mir-194-5p	C1RL-AS1
hsa-mir-194-5p	TUG1
hsa-mir-194-5p	AC092535.3
hsa-mir-194-5p	LINC00641
hsa-mir-194-5p	JRK
hsa-mir-194-5p	AC009299.3
hsa-mir-194-5p	MALAT1
hsa-mir-194-5p	NEAT1
hsa-mir-194-5p	RP11-216F19.2
hsa-mir-194-5p	RP11-452F19.3
hsa-mir-194-5p	LINC00176
hsa-mir-346	PRR7-AS1
hsa-mir-346	RP11-415J8.7
hsa-mir-346	FBXL19-AS1
hsa-mir-346	SCARNA10
hsa-mir-346	PSMD6-AS2
hsa-mir-346	SNHG15
hsa-mir-346	RPS10P7
hsa-mir-346	CTA-204B4.6
hsa-mir-346	GAS5
hsa-mir-346	DLX6-AS1
hsa-mir-346	KCNQ1OT1
hsa-mir-346	JRK
hsa-mir-346	MALAT1
hsa-mir-346	RP11-216F19.2
hsa-mir-346	RP11-453E17.1
hsa-mir-107	CTD-2574D22.4
hsa-mir-107	EPHA1-AS1
hsa-mir-107	RP11-543D5.2
hsa-mir-107	AC016747.3
hsa-mir-107	RP11-588K22.2
hsa-mir-107	RP11-102F4.3
hsa-mir-107	CTBP1-AS1
hsa-mir-107	AP001065.2
hsa-mir-107	RP11-204M4.2
hsa-mir-107	RP11-21N3.1
hsa-mir-107	RP11-640M9.1
hsa-mir-107	GS1-358P8.4
hsa-mir-107	RP11-429J17.6
hsa-mir-107	CTB-89H12.4
hsa-mir-107	RP11-413E6.8
hsa-mir-107	XIST
hsa-mir-107	H19
hsa-mir-107	SENP3-EIF4A1
hsa-mir-107	PTCHD3P1
hsa-mir-107	C14orf169
hsa-mir-107	AC084219.4
hsa-mir-107	NUTM2A-AS1
hsa-mir-107	TTN-AS1
hsa-mir-107	RP11-446H18.3
hsa-mir-107	RP11-923I11.1
hsa-mir-107	TP73-AS1
hsa-mir-107	RP6-24A23.7
hsa-mir-107	RP5-1061H20.4
hsa-mir-107	AC003092.1
hsa-mir-107	RP11-443N24.2
hsa-mir-107	LINC00630
hsa-mir-107	CTC-273B12.6
hsa-mir-107	RP11-677M14.3
hsa-mir-107	RP11-436H22.1
hsa-mir-107	CTA-204B4.6
hsa-mir-107	CTB-50E14.6
hsa-mir-107	LA16c-306E5.2
hsa-mir-107	RP11-390P2.4
hsa-mir-107	YLPM1
hsa-mir-107	RP11-473I1.10
hsa-mir-107	DLG1-AS1
hsa-mir-107	RP11-383J24.5
hsa-mir-107	HCG18
hsa-mir-107	RP3-486L4.3
hsa-mir-107	CROCCP2
hsa-mir-107	DLX6-AS1
hsa-mir-107	CTD-3138B18.5
hsa-mir-107	KCNQ1OT1
hsa-mir-107	LINC00662
hsa-mir-107	AC004383.4
hsa-mir-107	RP1-102H19.6
hsa-mir-107	HOTAIRM1
hsa-mir-107	RP11-361F15.2
hsa-mir-107	LINC00152
hsa-mir-107	RP11-64K12.2
hsa-mir-107	CWC15
hsa-mir-107	DCP1A
hsa-mir-107	CTD-2196E14.9
hsa-mir-107	AC105760.2
hsa-mir-107	CTD-3064H18.1
hsa-mir-107	TTC28-AS1
hsa-mir-107	NEAT1
hsa-mir-107	RP11-425M5.5
hsa-mir-107	FGD5-AS1
hsa-mir-107	RP11-461L13.3
hsa-mir-107	AD000090.2
hsa-mir-107	LINC00707
hsa-mir-146b-5p	RP11-395G23.3
hsa-mir-146b-5p	AC010226.4
hsa-mir-146b-5p	SNHG16
hsa-mir-146b-5p	RP11-220I1.1
hsa-mir-146b-5p	ZNF761
hsa-mir-146b-5p	XIST
hsa-mir-146b-5p	AC096772.6
hsa-mir-146b-5p	EPB41L4A-AS1
hsa-mir-146b-5p	RP11-159D12.2
hsa-mir-146b-5p	CTC-503J8.6
hsa-mir-146b-5p	HCG18
hsa-mir-146b-5p	KIAA1984-AS1
hsa-mir-146b-5p	RP4-773N10.5
hsa-mir-146b-5p	CTD-3138B18.5
hsa-mir-146b-5p	KCNQ1OT1
hsa-mir-146b-5p	SNHG7
hsa-mir-146b-5p	MALAT1
hsa-mir-146b-5p	NEAT1
hsa-mir-146b-5p	ZNF518A
hsa-mir-4295	RP11-363E7.4
hsa-mir-4295	CTB-92J24.2
hsa-mir-4295	RP11-290D2.4
hsa-mir-4295	RP11-355O1.11
hsa-mir-4295	CCAT1
hsa-mir-4295	RP11-84C13.1
hsa-mir-4295	AC135048.13
hsa-mir-4295	LINC00116
hsa-mir-4295	LINC00339
hsa-mir-4295	RP11-588K22.2
hsa-mir-4295	LINC00839
hsa-mir-4295	CTD-3092A11.2
hsa-mir-4295	AC007040.7
hsa-mir-4295	RP11-429J17.6
hsa-mir-4295	HOXA11-AS
hsa-mir-4295	XIST
hsa-mir-4295	H19
hsa-mir-4295	AP001065.15
hsa-mir-4295	AC084219.4
hsa-mir-4295	NUTM2A-AS1
hsa-mir-4295	SLC26A4-AS1
hsa-mir-4295	SEC22B
hsa-mir-4295	RP11-73M18.8
hsa-mir-4295	AC084018.1
hsa-mir-4295	RP11-344B2.2
hsa-mir-4295	HOXD-AS1
hsa-mir-4295	ZNRD1-AS1
hsa-mir-4295	HOTAIR
hsa-mir-4295	RP11-656D10.3
hsa-mir-4295	RP1-178F10.3
hsa-mir-4295	RP11-197P3.5
hsa-mir-4295	CTA-204B4.6
hsa-mir-4295	MAP3K14
hsa-mir-4295	PRKCQ-AS1
hsa-mir-4295	RP4-639F20.3
hsa-mir-4295	BOLA3-AS1
hsa-mir-4295	TMEM161B-AS1
hsa-mir-4295	KCNQ1OT1
hsa-mir-4295	RP11-361F15.2
hsa-mir-4295	CTC-281B15.1
hsa-mir-4295	RP13-638C3.2
hsa-mir-4295	LINC00667
hsa-mir-4295	CTD-2369P2.2
hsa-mir-4295	AC007038.7
hsa-mir-4295	FGD5-AS1
hsa-mir-4295	MIR17HG
hsa-mir-378c	LINC00657
hsa-mir-378c	RP11-392M18.5
hsa-mir-378c	RP11-159D12.9
hsa-mir-378c	OIP5-AS1
hsa-mir-378c	RN7SL1
hsa-mir-378c	FBXL19-AS1
hsa-mir-378c	JPX
hsa-mir-378c	RP5-837J1.2
hsa-mir-378c	Z97634.5
hsa-mir-378c	SLC37A4
hsa-mir-378c	RECQL4
hsa-mir-378c	LINC00094
hsa-mir-378c	CTC-479C5.17
hsa-mir-378c	RP11-701H24.5
hsa-mir-378c	RP11-405O10.2
hsa-mir-378c	RP11-118N24.3
hsa-mir-378c	RP11-519M16.1
hsa-mir-378c	CTA-204B4.6
hsa-mir-378c	CTC-444N24.8
hsa-mir-378c	HCG18
hsa-mir-378c	CASP8AP2
hsa-mir-378c	AP006222.2
hsa-mir-378c	LINC00641
hsa-mir-378c	RP11-361F15.2
hsa-mir-378c	MALAT1
hsa-mir-378c	RP4-622L5.2
hsa-mir-202-3p	RP11-175O19.4
hsa-mir-202-3p	LINC00657
hsa-mir-202-3p	AC135048.13
hsa-mir-202-3p	RP11-398F12.1
hsa-mir-202-3p	RP11-793H13.8
hsa-mir-202-3p	RP11-220I1.1
hsa-mir-202-3p	RP11-170L3.8
hsa-mir-202-3p	ZNF761
hsa-mir-202-3p	CTD-2555A7.2
hsa-mir-202-3p	XIST
hsa-mir-202-3p	AC096772.6
hsa-mir-202-3p	CTC-228N24.3
hsa-mir-202-3p	RP11-344E13.3
hsa-mir-202-3p	RP11-372K14.2
hsa-mir-202-3p	SLC37A4
hsa-mir-202-3p	UHRF1
hsa-mir-202-3p	RP11-139H15.1
hsa-mir-202-3p	CTB-96E2.3
hsa-mir-202-3p	AC104389.28
hsa-mir-202-3p	RP11-473I1.9
hsa-mir-202-3p	SH3BP5-AS1
hsa-mir-202-3p	RP11-872J21.3
hsa-mir-202-3p	RP11-96D1.10
hsa-mir-202-3p	RP5-837I24.6
hsa-mir-202-3p	JRK
hsa-mir-202-3p	MALAT1
hsa-mir-202-3p	AC092835.2
hsa-mir-202-3p	NEAT1
hsa-mir-202-3p	RP11-53O19.1
hsa-mir-202-3p	FGD5-AS1
hsa-mir-202-3p	RP11-38J22.6
hsa-mir-210-3p	RP11-398F12.1
hsa-mir-210-3p	RP11-311C24.1
hsa-mir-210-3p	PSMG3-AS1
hsa-mir-210-3p	SCARNA9
hsa-mir-210-3p	hsa-mir-744
hsa-mir-210-3p	LINC00473
hsa-mir-302e	RP11-197N18.2
hsa-mir-302e	LINC00657
hsa-mir-302e	RP11-392M18.5
hsa-mir-302e	RP11-355O1.11
hsa-mir-302e	hsa-mir-6080
hsa-mir-302e	RP11-68L18.1
hsa-mir-302e	HNRNPU-AS1
hsa-mir-302e	RP11-701H24.2
hsa-mir-302e	AC005083.1
hsa-mir-302e	AL589743.1
hsa-mir-302e	SNHG16
hsa-mir-302e	GS1-358P8.4
hsa-mir-302e	RP11-220I1.1
hsa-mir-302e	RP1-39G22.7
hsa-mir-302e	CT49
hsa-mir-302e	XIST
hsa-mir-302e	MIR4720
hsa-mir-302e	SCAMP1
hsa-mir-302e	RP11-145M9.4
hsa-mir-302e	LINC00472
hsa-mir-302e	RP11-73M18.8
hsa-mir-302e	HOXA-AS2
hsa-mir-302e	CTD-2037K23.2
hsa-mir-302e	RP11-139H15.1
hsa-mir-302e	RP11-140H17.1
hsa-mir-302e	RP11-379K17.11
hsa-mir-302e	RP11-197P3.5
hsa-mir-302e	AC108142.1
hsa-mir-302e	RP11-31E23.1
hsa-mir-302e	RP5-1024G6.8
hsa-mir-302e	CTA-204B4.6
hsa-mir-302e	RP11-498C9.15
hsa-mir-302e	MAP3K14
hsa-mir-302e	COX10-AS1
hsa-mir-302e	RP11-701H24.4
hsa-mir-302e	RP11-315C6.3
hsa-mir-302e	HCG18
hsa-mir-302e	CASP8AP2
hsa-mir-302e	RP11-429D19.1
hsa-mir-302e	RP11-399O19.8
hsa-mir-302e	C11orf95
hsa-mir-302e	RP4-773N10.5
hsa-mir-302e	RP11-509J21.3
hsa-mir-302e	AL163636.6
hsa-mir-302e	RP11-156E6.1
hsa-mir-302e	RP11-615I2.7
hsa-mir-302e	RP11-96D1.6
hsa-mir-302e	RP11-305N23.1
hsa-mir-302e	MAGI1-IT1
hsa-mir-302e	CTD-2162K18.5
hsa-mir-302e	LINC00338
hsa-mir-302e	CTC-444N24.11
hsa-mir-302e	KB-1460A1.5
hsa-mir-302e	PPP1R9B
hsa-mir-302e	ZNF518A
hsa-mir-302e	RP5-1024G6.5
hsa-mir-302e	FGD5-AS1
hsa-mir-302e	MIR17HG
hsa-mir-302e	BAIAP2-AS1
hsa-mir-129-5p	RP11-761E20.1
hsa-mir-129-5p	RP11-395G23.3
hsa-mir-129-5p	RP11-102F4.3
hsa-mir-129-5p	OIP5-AS1
hsa-mir-129-5p	AC156455.1
hsa-mir-129-5p	SNORD57
hsa-mir-129-5p	XIST
hsa-mir-129-5p	RP11-849F2.8
hsa-mir-129-5p	RP11-738E22.2
hsa-mir-129-5p	NUTM2A-AS1
hsa-mir-129-5p	RP11-276H19.1
hsa-mir-129-5p	RP11-139H15.1
hsa-mir-129-5p	LINC00665
hsa-mir-129-5p	RP11-214O1.2
hsa-mir-129-5p	CTA-204B4.6
hsa-mir-129-5p	RP1-37E16.12
hsa-mir-129-5p	RP11-973H7.2
hsa-mir-129-5p	HCG18
hsa-mir-129-5p	CTD-2086O20.3
hsa-mir-129-5p	LINC00263
hsa-mir-129-5p	RP11-480D4.3
hsa-mir-129-5p	RP4-773N10.5
hsa-mir-129-5p	CTC-487M23.5
hsa-mir-129-5p	HOTAIRM1
hsa-mir-129-5p	RP11-477D19.2
hsa-mir-129-5p	TBC1D3P1-DHX40P1
hsa-mir-129-5p	AF131215.9
hsa-mir-129-5p	MALAT1
hsa-mir-129-5p	RP4-622L5.2
hsa-mir-129-5p	NEAT1
hsa-mir-129-5p	ZNF518A
hsa-mir-129-5p	FGD5-AS1
hsa-mir-129-5p	LINC00689
hsa-mir-129-5p	RP11-18I14.10
hsa-mir-129-5p	ERVK3-1
hsa-mir-129-5p	RP5-955M13.3
hsa-mir-130a-3p	RP11-363E7.4
hsa-mir-130a-3p	CTB-92J24.2
hsa-mir-130a-3p	RP11-290D2.4
hsa-mir-130a-3p	RP11-355O1.11
hsa-mir-130a-3p	CCAT1
hsa-mir-130a-3p	RP11-84C13.1
hsa-mir-130a-3p	AC135048.13
hsa-mir-130a-3p	LINC00116
hsa-mir-130a-3p	LINC00339
hsa-mir-130a-3p	RP11-588K22.2
hsa-mir-130a-3p	LINC00839
hsa-mir-130a-3p	CTD-3092A11.2
hsa-mir-130a-3p	AC007040.7
hsa-mir-130a-3p	RP11-429J17.6
hsa-mir-130a-3p	HOXA11-AS
hsa-mir-130a-3p	XIST
hsa-mir-130a-3p	H19
hsa-mir-130a-3p	AP001065.15
hsa-mir-130a-3p	AC084219.4
hsa-mir-130a-3p	NUTM2A-AS1
hsa-mir-130a-3p	SLC26A4-AS1
hsa-mir-130a-3p	SEC22B
hsa-mir-130a-3p	RP11-73M18.8
hsa-mir-130a-3p	AC084018.1
hsa-mir-130a-3p	RP11-344B2.2
hsa-mir-130a-3p	HOXD-AS1
hsa-mir-130a-3p	ZNRD1-AS1
hsa-mir-130a-3p	HOTAIR
hsa-mir-130a-3p	RP11-656D10.3
hsa-mir-130a-3p	RP1-178F10.3
hsa-mir-130a-3p	RP11-197P3.5
hsa-mir-130a-3p	CTA-204B4.6
hsa-mir-130a-3p	MAP3K14
hsa-mir-130a-3p	PRKCQ-AS1
hsa-mir-130a-3p	RP4-639F20.3
hsa-mir-130a-3p	BOLA3-AS1
hsa-mir-130a-3p	TMEM161B-AS1
hsa-mir-130a-3p	KCNQ1OT1
hsa-mir-130a-3p	RP11-361F15.2
hsa-mir-130a-3p	CTC-281B15.1
hsa-mir-130a-3p	RP13-638C3.2
hsa-mir-130a-3p	LINC00667
hsa-mir-130a-3p	CTD-2369P2.2
hsa-mir-130a-3p	AC007038.7
hsa-mir-130a-3p	FGD5-AS1
hsa-mir-130a-3p	MIR17HG
hsa-mir-192-5p	RP11-170L3.8
hsa-mir-192-5p	XIST
hsa-mir-192-5p	RP11-400F19.6
hsa-mir-192-5p	AC084018.1
hsa-mir-192-5p	RP11-276H19.2
hsa-mir-192-5p	RP11-347I19.3
hsa-mir-192-5p	RP5-1028K7.2
hsa-mir-192-5p	RP11-216F19.2
hsa-mir-139-5p	RP11-21N3.1
hsa-mir-139-5p	SNHG3
hsa-mir-139-5p	RP11-170L3.8
hsa-mir-139-5p	AC009948.5
hsa-mir-139-5p	RP11-815I9.4
hsa-mir-139-5p	XIST
hsa-mir-139-5p	CTD-2017D11.1
hsa-mir-139-5p	TTN-AS1
hsa-mir-139-5p	RP11-283C24.1
hsa-mir-139-5p	RP11-553L6.5
hsa-mir-139-5p	AC012360.4
hsa-mir-139-5p	DHRS4-AS1
hsa-mir-139-5p	RP11-282O18.3
hsa-mir-139-5p	RP11-357C3.3
hsa-mir-139-5p	ZNF718
hsa-mir-139-5p	CTA-204B4.6
hsa-mir-139-5p	MAP3K14
hsa-mir-139-5p	CASP8AP2
hsa-mir-139-5p	AC084082.3
hsa-mir-139-5p	RP4-806M20.3
hsa-mir-139-5p	RP1-239B22.5
hsa-mir-139-5p	JRK
hsa-mir-139-5p	HCP5
hsa-mir-139-5p	RP11-284M14.1
hsa-mir-326	RP11-104H15.7
hsa-mir-326	POLDIP2
hsa-mir-326	hsa-mir-6080
hsa-mir-326	RUSC1-AS1
hsa-mir-326	RP11-54O7.1
hsa-mir-326	AC096579.7
hsa-mir-326	SNHG3
hsa-mir-326	RP11-478C19.2
hsa-mir-326	XIST
hsa-mir-326	XXbac-BPG254F23.6
hsa-mir-326	SNHG1
hsa-mir-326	PLK1S1
hsa-mir-326	SLC37A4
hsa-mir-326	RECQL4
hsa-mir-326	PDXDC2P
hsa-mir-326	MAL2
hsa-mir-326	DHRS4-AS1
hsa-mir-326	RPPH1
hsa-mir-326	RP11-923I11.1
hsa-mir-326	C17orf76-AS1
hsa-mir-326	TP73-AS1
hsa-mir-326	HOXD-AS1
hsa-mir-326	HOTAIR
hsa-mir-326	RP11-66D17.5
hsa-mir-326	AP001062.7
hsa-mir-326	CTD-2270L9.5
hsa-mir-326	KDM5B-AS1
hsa-mir-326	MAP3K14
hsa-mir-326	RP11-701H24.4
hsa-mir-326	RP1-37E16.12
hsa-mir-326	AC003104.1
hsa-mir-326	RP3-510O8.4
hsa-mir-326	RP11-488C13.5
hsa-mir-326	RP13-507I23.1
hsa-mir-326	C1RL-AS1
hsa-mir-326	CTD-3099C6.9
hsa-mir-326	RP11-290F20.1
hsa-mir-326	LINC00663
hsa-mir-326	KCNQ1OT1
hsa-mir-326	SPON1
hsa-mir-326	RP4-647J21.1
hsa-mir-326	RP11-186B7.4
hsa-mir-326	NEFL
hsa-mir-326	RP11-452L6.5
hsa-mir-326	TEN1-CDK3
hsa-mir-326	CTA-250D10.23
hsa-mir-708-5p	RP11-197N18.2
hsa-mir-708-5p	CTC-338M12.3
hsa-mir-708-5p	MCM3AP-AS1
hsa-mir-708-5p	hsa-mir-151a
hsa-mir-708-5p	OIP5-AS1
hsa-mir-708-5p	MMP24-AS1
hsa-mir-708-5p	JPX
hsa-mir-708-5p	RP11-169K16.9
hsa-mir-708-5p	CTD-2116N17.1
hsa-mir-708-5p	RP11-815I9.4
hsa-mir-708-5p	RP11-384K6.6
hsa-mir-708-5p	XIST
hsa-mir-708-5p	PLK1S1
hsa-mir-708-5p	AC096772.6
hsa-mir-708-5p	RP11-23J9.4
hsa-mir-708-5p	SLC37A4
hsa-mir-708-5p	RP5-1172N10.4
hsa-mir-708-5p	CTD-3195I5.1
hsa-mir-708-5p	LINC00665
hsa-mir-708-5p	AJ271736.10
hsa-mir-708-5p	CTB-96E2.3
hsa-mir-708-5p	LOXL1-AS1
hsa-mir-708-5p	CTD-3014M21.4
hsa-mir-708-5p	RP3-323N1.2
hsa-mir-708-5p	RP5-1043L13.1
hsa-mir-708-5p	RP11-365O16.6
hsa-mir-708-5p	AC092535.3
hsa-mir-708-5p	RP11-615I2.7
hsa-mir-708-5p	RP11-467L20.9
hsa-mir-708-5p	RP4-647J21.1
hsa-mir-708-5p	JRK
hsa-mir-708-5p	DCP1A
hsa-mir-708-5p	TBC1D3P1-DHX40P1
hsa-mir-708-5p	RP11-186B7.4
hsa-mir-708-5p	MALAT1
hsa-mir-708-5p	NEFL
hsa-mir-708-5p	RP11-18A3.4
hsa-mir-708-5p	NEAT1
hsa-mir-708-5p	ZNF518A
hsa-mir-708-5p	FENDRR
hsa-mir-708-5p	AJ271736.10
hsa-mir-708-5p	AD000090.2
hsa-mir-708-5p	LINC00514
hsa-mir-708-5p	RP11-496I9.1
hsa-mir-34c-5p	CTD-2090I13.1
hsa-mir-34c-5p	RP11-420G6.4
hsa-mir-34c-5p	AC005863.1
hsa-mir-34c-5p	AC112229.7
hsa-mir-34c-5p	AC078852.1
hsa-mir-34c-5p	RP11-54O7.1
hsa-mir-34c-5p	RP11-284N8.3
hsa-mir-34c-5p	CTD-2245O6.1
hsa-mir-34c-5p	RP11-397D12.6
hsa-mir-34c-5p	XIST
hsa-mir-34c-5p	NUTM2A-AS1
hsa-mir-34c-5p	CTD-3185P2.1
hsa-mir-34c-5p	PCBP1-AS1
hsa-mir-34c-5p	RP11-730K11.1
hsa-mir-34c-5p	RP11-380L11.4
hsa-mir-34c-5p	AC013268.5
hsa-mir-34c-5p	RP11-153A23.6
hsa-mir-34c-5p	RP1-5O6.6
hsa-mir-34c-5p	CTA-204B4.6
hsa-mir-34c-5p	CTC-444N24.8
hsa-mir-34c-5p	RP1-37E16.12
hsa-mir-34c-5p	CTC-503J8.6
hsa-mir-34c-5p	HCG18
hsa-mir-34c-5p	CASP8AP2
hsa-mir-34c-5p	C11orf95
hsa-mir-34c-5p	RP4-773N10.5
hsa-mir-34c-5p	RP11-120D5.1
hsa-mir-34c-5p	RP11-20G6.3
hsa-mir-34c-5p	KCNQ1OT1
hsa-mir-34c-5p	LINC00662
hsa-mir-34c-5p	SNHG7
hsa-mir-34c-5p	CTC-487M23.5
hsa-mir-34c-5p	RP11-552M11.4
hsa-mir-34c-5p	RP11-156L14.1
hsa-mir-34c-5p	GNAS-AS1
hsa-mir-34c-5p	CTC-281B15.1
hsa-mir-34c-5p	DCP1A
hsa-mir-34c-5p	CTD-2020K17.1
hsa-mir-34c-5p	LINC00667
hsa-mir-34c-5p	NEAT1
hsa-mir-34c-5p	RP11-216F19.2
hsa-mir-34c-5p	RP11-6N17.9
hsa-mir-34c-5p	ERVK3-1
hsa-mir-34c-5p	RP11-496I9.1
hsa-mir-125b-5p	RP11-174G17.2
hsa-mir-125b-5p	HNRNPU-AS1
hsa-mir-125b-5p	NOP14-AS1
hsa-mir-125b-5p	CTC-338M12.2
hsa-mir-125b-5p	RP11-29G8.3
hsa-mir-125b-5p	RP11-473M20.16
hsa-mir-125b-5p	XIST
hsa-mir-125b-5p	AC096772.6
hsa-mir-125b-5p	AC005532.5
hsa-mir-125b-5p	RP11-298I3.1
hsa-mir-125b-5p	RP11-73M18.8
hsa-mir-125b-5p	AC009133.15
hsa-mir-125b-5p	CTD-3185P2.2
hsa-mir-125b-5p	ZNRD1-AS1
hsa-mir-125b-5p	RP11-132A1.3
hsa-mir-125b-5p	RP11-77H9.2
hsa-mir-125b-5p	RP11-492E3.1
hsa-mir-125b-5p	RP11-66N24.4
hsa-mir-125b-5p	RP11-264L1.3
hsa-mir-125b-5p	SPTY2D1-AS1
hsa-mir-125b-5p	KCNQ1OT1
hsa-mir-125b-5p	AC092535.3
hsa-mir-125b-5p	JRK
hsa-mir-125b-5p	LINC00661
hsa-mir-125b-5p	CTC-273B12.8
hsa-mir-125b-5p	AF011889.4
hsa-let-7a-5p	TTTY15
hsa-let-7a-5p	RP11-498P14.3
hsa-let-7a-5p	RP11-197N18.2
hsa-let-7a-5p	AC074117.10
hsa-let-7a-5p	hsa-mir-6080
hsa-let-7a-5p	RP11-27I1.2
hsa-let-7a-5p	SNHG16
hsa-let-7a-5p	SCARNA10
hsa-let-7a-5p	HOXA11-AS
hsa-let-7a-5p	RP11-282O18.6
hsa-let-7a-5p	XIST
hsa-let-7a-5p	RP11-727A23.5
hsa-let-7a-5p	MIR4720
hsa-let-7a-5p	PTCHD3P1
hsa-let-7a-5p	NUTM2A-AS1
hsa-let-7a-5p	MAL2
hsa-let-7a-5p	RP11-923I11.1
hsa-let-7a-5p	RP11-819C21.1
hsa-let-7a-5p	RP11-492E3.1
hsa-let-7a-5p	LINC00665
hsa-let-7a-5p	CTD-2270L9.5
hsa-let-7a-5p	RP11-996F15.2
hsa-let-7a-5p	RP11-214O1.2
hsa-let-7a-5p	CDKN2B-AS1
hsa-let-7a-5p	CTA-204B4.6
hsa-let-7a-5p	RP11-277P12.20
hsa-let-7a-5p	RP11-473I1.10
hsa-let-7a-5p	RP13-507I23.1
hsa-let-7a-5p	RP11-264B17.3
hsa-let-7a-5p	RP11-834C11.4
hsa-let-7a-5p	CASP8AP2
hsa-let-7a-5p	LINC00263
hsa-let-7a-5p	CTD-3138B18.5
hsa-let-7a-5p	KCNQ1OT1
hsa-let-7a-5p	RP11-1103G16.1
hsa-let-7a-5p	RP11-457M11.2
hsa-let-7a-5p	AC105760.2
hsa-let-7a-5p	NEAT1
hsa-let-7a-5p	ZNF518A
hsa-let-7a-5p	RP11-452L6.5
hsa-let-7a-5p	UBXN8
hsa-let-7a-5p	XXbac-BPG300A18.13
hsa-mir-100-5p	RP11-169K16.9
hsa-mir-100-5p	SDCBP2-AS1
hsa-mir-100-5p	CTD-2651B20.7
hsa-mir-3167	RP11-175O19.4
hsa-mir-3167	RP11-290D2.4
hsa-mir-3167	AC016747.3
hsa-mir-3167	MCM3AP-AS1
hsa-mir-3167	FBXL19-AS1
hsa-mir-3167	RP11-277L2.2
hsa-mir-3167	XIST
hsa-mir-3167	Z97634.5
hsa-mir-3167	AC074286.1
hsa-mir-3167	AC093375.1
hsa-mir-3167	RP11-446H18.3
hsa-mir-3167	RP6-24A23.7
hsa-mir-3167	RP11-403I13.4
hsa-mir-3167	AC013268.5
hsa-mir-3167	AC141846.4
hsa-mir-3167	RP1-37E16.12
hsa-mir-3167	RP11-973H7.2
hsa-mir-3167	GAS5
hsa-mir-3167	CROCCP2
hsa-mir-3167	RP4-806M20.3
hsa-mir-3167	KCNQ1OT1
hsa-mir-3167	JRK
hsa-mir-3167	MALAT1
hsa-mir-3167	RP11-718G2.3
hsa-mir-3167	LINC00689
hsa-mir-3167	LINC00707
hsa-mir-200c-3p	CTB-92J24.2
hsa-mir-200c-3p	AC005154.5
hsa-mir-200c-3p	OIP5-AS1
hsa-mir-200c-3p	RP11-277L2.2
hsa-mir-200c-3p	RP11-690D19.3
hsa-mir-200c-3p	XIST
hsa-mir-200c-3p	RP11-1134I14.8
hsa-mir-200c-3p	SCAMP1
hsa-mir-200c-3p	RP11-145M9.4
hsa-mir-200c-3p	MAPKAPK5-AS1
hsa-mir-200c-3p	RP11-379K17.4
hsa-mir-200c-3p	CTD-3185P2.1
hsa-mir-200c-3p	MATN1-AS1
hsa-mir-200c-3p	RP6-24A23.7
hsa-mir-200c-3p	RP11-403I13.4
hsa-mir-200c-3p	RP11-91G21.2
hsa-mir-200c-3p	CTA-204B4.6
hsa-mir-200c-3p	CTD-2630F21.1
hsa-mir-200c-3p	RP11-473I1.10
hsa-mir-200c-3p	RP13-507I23.1
hsa-mir-200c-3p	RP11-18F14.2
hsa-mir-200c-3p	RP11-214C8.5
hsa-mir-200c-3p	CTD-3099C6.9
hsa-mir-200c-3p	RP11-429J17.7
hsa-mir-200c-3p	C11orf95
hsa-mir-200c-3p	RP4-773N10.5
hsa-mir-200c-3p	RP5-1085F17.3
hsa-mir-200c-3p	LINC00641
hsa-mir-200c-3p	RP11-361F15.2
hsa-mir-200c-3p	CWC15
hsa-mir-200c-3p	MALAT1
hsa-mir-200c-3p	LINC00667
hsa-mir-200c-3p	PPP1R9B
hsa-mir-200c-3p	ZNF518A
hsa-mir-200c-3p	RP11-305E6.4
hsa-mir-200c-3p	AC005154.6
hsa-mir-200c-3p	UBXN8
hsa-mir-141-3p	RP11-106M3.2
hsa-mir-141-3p	DYX1C1-CCPG1
hsa-mir-141-3p	OIP5-AS1
hsa-mir-141-3p	RP11-793H13.8
hsa-mir-141-3p	U47924.19
hsa-mir-141-3p	SNHG16
hsa-mir-141-3p	CTBP1-AS1
hsa-mir-141-3p	RP11-220I1.1
hsa-mir-141-3p	RP1-283E3.8
hsa-mir-141-3p	XIST
hsa-mir-141-3p	RP5-890O3.9
hsa-mir-141-3p	AC003665.1
hsa-mir-141-3p	EMG1
hsa-mir-141-3p	SEC22B
hsa-mir-141-3p	C17orf76-AS1
hsa-mir-141-3p	TP73-AS1
hsa-mir-141-3p	SNHG15
hsa-mir-141-3p	RP11-469M7.1
hsa-mir-141-3p	PINK1-AS
hsa-mir-141-3p	LA16c-306E5.2
hsa-mir-141-3p	RP11-33N16.3
hsa-mir-141-3p	RP11-203J24.9
hsa-mir-141-3p	AC010729.1
hsa-mir-141-3p	TMEM161B-AS1
hsa-mir-141-3p	RP11-13N13.2
hsa-mir-141-3p	DLX6-AS1
hsa-mir-141-3p	RP11-539I5.1
hsa-mir-141-3p	LINC00661
hsa-mir-141-3p	AC016629.8
hsa-mir-141-3p	MALAT1
hsa-mir-141-3p	CTC-444N24.11
hsa-mir-141-3p	LINC00319
hsa-mir-141-3p	TRAF3IP2-AS1
hsa-mir-141-3p	AD000090.2
hsa-mir-613	RP11-331F9.10
hsa-mir-613	AC135048.13
hsa-mir-613	HNRNPU-AS1
hsa-mir-613	RP11-311C24.1
hsa-mir-613	RP5-1180C10.2
hsa-mir-613	RP11-277L2.2
hsa-mir-613	RP11-902B17.1
hsa-mir-613	SENP3-EIF4A1
hsa-mir-613	GS1-251I9.4
hsa-mir-613	AC005562.1
hsa-mir-613	AC084219.4
hsa-mir-613	NUTM2A-AS1
hsa-mir-613	SEC22B
hsa-mir-613	RP11-403I13.4
hsa-mir-613	SNHG14
hsa-mir-613	HOTAIR
hsa-mir-613	CTA-204B4.6
hsa-mir-613	RP11-498C9.15
hsa-mir-613	COX10-AS1
hsa-mir-613	RP11-701H24.4
hsa-mir-613	RP11-506M13.3
hsa-mir-613	RP11-421L21.3
hsa-mir-613	LINC00482
hsa-mir-613	LINC00242
hsa-mir-613	LINC00641
hsa-mir-613	AL022344.4
hsa-mir-613	CWC15
hsa-mir-613	FLI1-AS1
hsa-mir-613	MALAT1
hsa-mir-613	RP11-46A10.5
hsa-mir-613	RP11-216F19.2
hsa-mir-613	AC012146.7
hsa-mir-613	LINC00707
hsa-mir-196a-5p	RP11-226L15.5
hsa-mir-196a-5p	hsa-mir-6080
hsa-mir-196a-5p	SNHG16
hsa-mir-196a-5p	GS1-358P8.4
hsa-mir-196a-5p	SNHG3
hsa-mir-196a-5p	XIST
hsa-mir-196a-5p	H19
hsa-mir-196a-5p	LINC00472
hsa-mir-196a-5p	CTD-2037K23.2
hsa-mir-196a-5p	HOXA-AS4
hsa-mir-196a-5p	USP6NL-IT1
hsa-mir-196a-5p	CTA-204B4.6
hsa-mir-196a-5p	GAS5
hsa-mir-196a-5p	HCG18
hsa-mir-196a-5p	TUG1
hsa-mir-196a-5p	RP11-20G6.3
hsa-mir-196a-5p	RP11-156E6.1
hsa-mir-196a-5p	RP11-342K6.1
hsa-mir-196a-5p	ZNF518A
hsa-mir-196a-5p	KB-431C1.4
hsa-mir-196a-5p	FGD5-AS1
hsa-mir-196a-5p	UBXN8
hsa-mir-615-3p	LINC00657
hsa-mir-615-3p	POLDIP2
hsa-mir-615-3p	XIST
hsa-mir-615-3p	XXbac-BPG308K3.5
hsa-mir-615-3p	LA16c-306E5.2
hsa-mir-615-3p	CTC-503J8.6
hsa-mir-615-3p	RP11-264B17.3
hsa-mir-615-3p	AP000721.4
hsa-mir-615-3p	GNAS-AS1
hsa-mir-615-3p	CTD-2020K17.1
hsa-mir-615-3p	HOTTIP
hsa-mir-615-3p	CTD-2651B20.7
hsa-mir-148b-3p	CCAT1
hsa-mir-148b-3p	RP11-84C13.1
hsa-mir-148b-3p	KIF9-AS1
hsa-mir-148b-3p	RP11-54O7.1
hsa-mir-148b-3p	LINC00339
hsa-mir-148b-3p	RP11-231E4.4
hsa-mir-148b-3p	OIP5-AS1
hsa-mir-148b-3p	RP11-373L24.1
hsa-mir-148b-3p	RP11-15A1.3
hsa-mir-148b-3p	HOXA11-AS
hsa-mir-148b-3p	RP11-44F14.11
hsa-mir-148b-3p	XIST
hsa-mir-148b-3p	XXbac-BPG254F23.6
hsa-mir-148b-3p	H19
hsa-mir-148b-3p	NUTM2A-AS1
hsa-mir-148b-3p	EMG1
hsa-mir-148b-3p	RP11-977G19.5
hsa-mir-148b-3p	DHRS4-AS1
hsa-mir-148b-3p	RP11-73M18.8
hsa-mir-148b-3p	AC084018.1
hsa-mir-148b-3p	RP11-344B2.2
hsa-mir-148b-3p	ZNRD1-AS1
hsa-mir-148b-3p	HOTAIR
hsa-mir-148b-3p	RP11-656D10.3
hsa-mir-148b-3p	RP1-5O6.6
hsa-mir-148b-3p	CTA-204B4.6
hsa-mir-148b-3p	AC062029.1
hsa-mir-148b-3p	CTC-503J8.6
hsa-mir-148b-3p	HCG18
hsa-mir-148b-3p	RP11-506M13.3
hsa-mir-148b-3p	RP11-773D16.1
hsa-mir-148b-3p	KCNQ1OT1
hsa-mir-148b-3p	RP11-453F18__B.1
hsa-mir-148b-3p	HOTAIRM1
hsa-mir-148b-3p	DCP1A
hsa-mir-148b-3p	LINC00667
hsa-mir-148b-3p	PPP1R9B
hsa-mir-148b-3p	RP11-46A10.5
hsa-mir-148b-3p	RP11-216F19.2
hsa-mir-148b-3p	LINC00174
hsa-mir-148b-3p	RP11-252P19.3
hsa-mir-148b-3p	RP11-453E17.1
hsa-mir-148b-3p	AD000090.2
hsa-mir-148b-3p	A1BG-AS1
hsa-mir-148b-3p	BAIAP2-AS1
hsa-mir-26a-5p	AP000525.9
hsa-mir-26a-5p	RP11-175O19.4
hsa-mir-26a-5p	LINC00847
hsa-mir-26a-5p	LINC00657
hsa-mir-26a-5p	hsa-mir-6080
hsa-mir-26a-5p	RP11-105N13.4
hsa-mir-26a-5p	HNRNPU-AS1
hsa-mir-26a-5p	XXbac-B461K10.4
hsa-mir-26a-5p	AL589743.1
hsa-mir-26a-5p	OIP5-AS1
hsa-mir-26a-5p	SNHG5
hsa-mir-26a-5p	CTD-2555O16.2
hsa-mir-26a-5p	RP11-396C23.2
hsa-mir-26a-5p	RP11-478C19.2
hsa-mir-26a-5p	WASIR2
hsa-mir-26a-5p	MIR4720
hsa-mir-26a-5p	RP11-738E22.2
hsa-mir-26a-5p	DLGAP1-AS1
hsa-mir-26a-5p	SCAMP1
hsa-mir-26a-5p	AC058791.2
hsa-mir-26a-5p	RP11-282O18.3
hsa-mir-26a-5p	RP6-24A23.7
hsa-mir-26a-5p	LINC00205
hsa-mir-26a-5p	RP5-1172N10.4
hsa-mir-26a-5p	RP11-492E3.2
hsa-mir-26a-5p	RP11-31E23.1
hsa-mir-26a-5p	ZNF718
hsa-mir-26a-5p	CTD-2270L9.5
hsa-mir-26a-5p	RP11-706J10.1
hsa-mir-26a-5p	RP11-276H19.2
hsa-mir-26a-5p	RP11-473I1.10
hsa-mir-26a-5p	GAS5
hsa-mir-26a-5p	LINC00240
hsa-mir-26a-5p	SETD5-AS1
hsa-mir-26a-5p	DLX6-AS1
hsa-mir-26a-5p	RP11-1006G14.4
hsa-mir-26a-5p	CTD-2314B22.3
hsa-mir-26a-5p	LINC00610
hsa-mir-26a-5p	CWC15
hsa-mir-26a-5p	AC005082.12
hsa-mir-26a-5p	MALAT1
hsa-mir-26a-5p	RP11-78O7.2
hsa-mir-26a-5p	NEFL
hsa-mir-26a-5p	RP5-1172N10.3
hsa-mir-26a-5p	XXbac-BPG32J3.20
hsa-mir-26a-5p	RP11-452F19.3
hsa-mir-26a-5p	HCG11
hsa-mir-26a-5p	SNHG6
hsa-let-7i-5p	TTTY15
hsa-let-7i-5p	RP11-498P14.3
hsa-let-7i-5p	RP11-197N18.2
hsa-let-7i-5p	AC074117.10
hsa-let-7i-5p	hsa-mir-6080
hsa-let-7i-5p	RP11-27I1.2
hsa-let-7i-5p	SNHG16
hsa-let-7i-5p	SCARNA10
hsa-let-7i-5p	HOXA11-AS
hsa-let-7i-5p	RP11-282O18.6
hsa-let-7i-5p	XIST
hsa-let-7i-5p	RP11-727A23.5
hsa-let-7i-5p	MIR4720
hsa-let-7i-5p	PTCHD3P1
hsa-let-7i-5p	NUTM2A-AS1
hsa-let-7i-5p	MAL2
hsa-let-7i-5p	RP11-923I11.1
hsa-let-7i-5p	RP11-819C21.1
hsa-let-7i-5p	RP11-492E3.1
hsa-let-7i-5p	LINC00665
hsa-let-7i-5p	CTD-2270L9.5
hsa-let-7i-5p	RP11-996F15.2
hsa-let-7i-5p	RP11-214O1.2
hsa-let-7i-5p	CDKN2B-AS1
hsa-let-7i-5p	CTA-204B4.6
hsa-let-7i-5p	RP11-277P12.20
hsa-let-7i-5p	RP11-473I1.10
hsa-let-7i-5p	RP13-507I23.1
hsa-let-7i-5p	RP11-264B17.3
hsa-let-7i-5p	RP11-834C11.4
hsa-let-7i-5p	CASP8AP2
hsa-let-7i-5p	LINC00263
hsa-let-7i-5p	CTD-3138B18.5
hsa-let-7i-5p	KCNQ1OT1
hsa-let-7i-5p	RP11-1103G16.1
hsa-let-7i-5p	RP11-457M11.2
[truncated: 18,325 more rows]
