# Supplementary material for: A Novel Method for Predicting Disease-Associated LncRNA-MiRNA Pairs Based on the Higher-Order Orthogonal Iteration
Source: Comput Math Methods Med. 2019 May 2;2019:7614850. doi: 10.1155/2019/7614850 (PMC6525924; doi:10.1155/2019/7614850)
Supplement: Supplementary 5 — Table 4: AUC score for 50 diseases in the framework of local LOOCV. [file 7614850.f5.xlsx]

## Sheet: Sheet1
the AUC of PADLMTF for the 50 diseases
Disease Name	AUC
Colon Cancer	0.9739
Kidney Cancer	0.9497
Adenocarcinoma	0.9636
Hepatocellular Carcinoma	0.9454
Hepatoblastoma	0.9622
Neurodegenerative Disease	0.9843
'endometrial cancer'	0.9775
'breast cancer'	0.9598
'thyroid cancer'	0.9318
'melanoma'	0.9446
'ovarian cancer'	0.9533
'basal cell carcinoma'	0.9912
'laryngeal squamous cell carcinoma'	0.9717
'testicular cancer'	0.9725
'malignant glioma'	0.9483
'osteosarcoma'	0.9468
'coronary heart disease'	0.9459
'liver cancer'	0.9432
'pituitary adenoma'	0.9733
'non-small cell lung carcinoma'	0.9427
'adrenocortical carcinoma'	0.9642
'papillary thyroid carcinoma'	0.934
'bladder carcinoma'	0.9605
'cervical cancer'	0.935
'multiple myeloma'	0.9197
'renal cell carcinoma'	0.9392
'renal clear cell carcinoma'	0.9535
'esophageal cancer'	0.9193
'mixed glioma'	0.9551
'head and neck squamous cell carcinoma'	0.9377
'cerebrovascular disease'	0.9441
'rheumatoid arthritis'	1
'chronic myeloid leukemia'	0.9464
'Burkitt's lymphoma'	0.9613
'systemic lupus erythematosus'	0.9104
'acute myeloid leukemia'	0.9345
'colorectal cancer'	0.9608
'nasopharynx carcinoma'	0.9382
'diabetes mellitus'	0.9921
'acute lymphocytic leukemia'	0.9556
'prostate cancer'	0.9488
'pre-eclampsia'	0.9402
'Alzheimer's disease'	0.9907
'urinary bladder cancer'	0.9318
'Huntington's disease'	0.9552
'stomach cancer'	0.8839
'polycythemia vera'	0.8822
'gastrointestinal stromal tumor'	0.8538
'type 2 diabetes mellitus'	0.8312
'lymphoma'	0.8872
