# Supplementary material for: A Novel Method for Predicting Disease-Associated LncRNA-MiRNA Pairs Based on the Higher-Order Orthogonal Iteration
Source: Comput Math Methods Med. 2019 May 2;2019:7614850. doi: 10.1155/2019/7614850 (PMC6525924; doi:10.1155/2019/7614850)
Supplement: Supplementary 8 — Table 7: the candidate lncRNA-miRNA pairs associated with colon cancer. In addition, the LncRNADisease and MNDR v2.0 databases have confirmed that these lncRNAs or miRNAs are associated with colon cancer. [file 7614850.f8.xlsx]

## Sheet: Sheet1
lncRNA	miRNA	Evi1	Evi2
tug1	hsa-miR-18a-5p	*	!
malat1	hsa-miR-200a-3p	#,*	!
malat1	hsa-miR-20b-5p	#,*	*
malat1	hsa-miR-26a-5p	#,*	*
malat1	hsa-miR-135b-5p	#,*	!
malat1	hsa-miR-194-5p	#,*	*
malat1	hsa-miR-224-5p	#,*	*
malat1	hsa-miR-124-3p	#,*	*
malat1	hsa-miR-206	#,*	*
malat1	hsa-miR-96-5p	#,*	*
malat1	hsa-miR-135a-5p	#,*	!
malat1	hsa-miR-150-5p	#,*	!
gas5	hsa-miR-18a-5p	Nal	!
malat1	hsa-miR-26b-5p	#,*	*
malat1	hsa-miR-23a-3p	#,*	*
malat1	hsa-miR-146b-5p	#,*	*
malat1	hsa-miR-181b-5p	#,*	*
malat1	hsa-miR-30d-5p	#,*	*
malat1	hsa-miR-185-5p	#,*	*
malat1	hsa-miR-144-3p	#,*	*
malat1	hsa-miR-204-5p	#,*	*
malat1	hsa-miR-30b-5p	#,*	!
malat1	hsa-miR-149-5p	#,*	*
malat1	hsa-miR-338-3p	#,*	*
malat1	hsa-miR-217	#,*	*
malat1	hsa-miR-374a-5p	#,*	*
malat1	hsa-miR-19a-3p	#,*	!
malat1	hsa-miR-19b-3p	#,*	!
malat1	hsa-miR-30e-5p	#,*	*
malat1	hsa-miR-708-5p	#,*	*
