# Supplementary material for: A Novel Method for Predicting Disease-Associated LncRNA-MiRNA Pairs Based on the Higher-Order Orthogonal Iteration
Source: Comput Math Methods Med. 2019 May 2;2019:7614850. doi: 10.1155/2019/7614850 (PMC6525924; doi:10.1155/2019/7614850)
Supplement: Supplementary 9 — Table 8: the candidate lncRNA-miRNA pairs associated with pprostate cancer. In addition, the LncRNADisease and MNDR v2.0 databases have confirmed that these lncRNAs or miRNAs are associated with colon cancer. [file 7614850.f9.xlsx]

## Sheet: Sheet1
lncRNA	miRNA	Evi1	Evi2
xist	hsa-miR-148b-3p	*	!
xist	hsa-let-7g-5p	*	!
malat1	hsa-miR-429	#	!
xist	hsa-miR-499a-5p	*	!
xist	hsa-miR-211-5p	*	Nan
malat1	hsa-miR-20b-5p	#	!
xist	hsa-miR-140-5p	*	Nan
xist	hsa-miR-19a-3p	*	!
xist	hsa-let-7e-5p	*	*
xist	hsa-miR-9-5p	*	!
xist	hsa-let-7d-5p	*	!
xist	hsa-miR-125a-5p	*	!
xist	hsa-miR-129-5p	*	*
xist	hsa-miR-338-3p	*	*
xist	hsa-miR-320a	*	!
xist	hsa-miR-193b-3p	*	*
malat1	hsa-miR-206	#	!
xist	hsa-miR-29c-3p	*	*
malat1	hsa-miR-135a-5p	#	!
xist	hsa-miR-301a-3p	*	!
xist	hsa-miR-429	*	!
malat1	hsa-miR-150-5p	#	!
malat1	hsa-miR-140-5p	#	*
neat1	hsa-let-7g-5p	#	!
xist	hsa-miR-196a-5p	*	!
xist	hsa-miR-135a-5p	*	!
xist	hsa-miR-20b-5p	*	!
xist	hsa-miR-506-3p	*	Nan
malat1	hsa-miR-320a	#	!
malat1	hsa-miR-144-3p	#	!
